# Supplementary material for: Four New Chromones from the Endophytic Fungus Phomopsis asparagi DHS-48 Isolated from the Chinese Mangrove Plant Rhizophora mangle
Source: MDPI journal article supplement (doi:10.3390/md19060348), 2021-06-19
Supplement: s1 [file s1]

## Supporting Information

Four New Chromones from the Endophytic Fungus *Phomopsis asparagi*  
DHS-48 Isolated from the Chinese Mangrove Plant *Rhizophora mangle*

Chengwen Wei,<sup>a</sup> Chunxiao Sun,<sup>b</sup> Zhao Feng,<sup>a</sup> Xuexia Zhang,<sup>a</sup> Jing Xu<sup>a,\*</sup>

<sup>a</sup> School of Chemical Engineering and Technology, Hainan University, Haikou  
570228, P. R. China.

<sup>b</sup> School of Medicine and Pharmacy, Ocean University of China, Qingdao 266003, P.  
R. China.

\* To whom correspondence should be addressed.

Prof. Dr. Jing Xu, Tel.: ++86-898-6627-9226, Fax: ++86-898-6627-9010, E-mail:

[happyjing3@163.com](mailto:happyjing3@163.com)

## Contents

|                                                                                                                 |    |
|-----------------------------------------------------------------------------------------------------------------|----|
| <b>Figure S1.</b> $^1\text{H}$ -NMR of phomochromenone D ( <b>1</b> )                                           | 4  |
| <b>Figure S2.</b> $^{13}\text{C}$ -NMR of phomochromenone D ( <b>1</b> )                                        | 4  |
| <b>Figure S3.</b> DEPT of phomochromenone D ( <b>1</b> )                                                        | 5  |
| <b>Figure S4.</b> $^1\text{H}$ - $^1\text{H}$ COSY of phomochromenone D ( <b>1</b> )                            | 5  |
| <b>Figure S5.</b> HMQC of phomochromenone D ( <b>1</b> )                                                        | 6  |
| <b>Figure S6.</b> HMBC of phomochromenone D ( <b>1</b> )                                                        | 6  |
| <b>Figure S7.</b> NOESY of phomochromenone D ( <b>1</b> )                                                       | 7  |
| <b>Figure S8.</b> HR-ESI-MS of phomochromenone D ( <b>1</b> )                                                   | 7  |
| <b>Figure S9.</b> $^1\text{H}$ -NMR of phomochromenone E ( <b>2</b> ) and F ( <b>3</b> )                        | 7  |
| <b>Figure S10.</b> $^{13}\text{C}$ -NMR of phomochromenone E ( <b>2</b> ) and F ( <b>3</b> )                    | 8  |
| <b>Figure S11.</b> DEPT of phomochromenone E ( <b>2</b> ) and F ( <b>3</b> )                                    | 8  |
| <b>Figure S12.</b> $^1\text{H}$ - $^1\text{H}$ COSY of phomochromenone E ( <b>2</b> ) and F ( <b>3</b> )        | 9  |
| <b>Figure S13.</b> HMQC of phomochromenone E ( <b>2</b> ) and F ( <b>3</b> )                                    | 9  |
| <b>Figure S14.</b> HMBC of phomochromenone E ( <b>2</b> ) and F ( <b>3</b> )                                    | 10 |
| <b>Figure S15.</b> HR-ESI-MS of phomochromenone E ( <b>2</b> ) and F ( <b>3</b> )                               | 10 |
| <b>Figure S16.</b> $^1\text{H}$ -NMR of phomochromenone G ( <b>4</b> )                                          | 10 |
| <b>Figure S17.</b> $^{13}\text{C}$ -NMR of phomochromenone G ( <b>4</b> )                                       | 11 |
| <b>Figure S18.</b> DEPT of phomochromenone G ( <b>4</b> )                                                       | 11 |
| <b>Figure S19.</b> $^1\text{H}$ - $^1\text{H}$ COSY of phomochromenone G ( <b>4</b> )                           | 12 |
| <b>Figure S20.</b> HMQC of phomochromenone G ( <b>4</b> )                                                       | 12 |
| <b>Figure S21.</b> HMBC of phomochromenone G ( <b>4</b> )                                                       | 13 |
| <b>Figure S22.</b> NOESY of phomochromenone G ( <b>4</b> )                                                      | 13 |
| <b>Figure S23.</b> HR-ESI-MS of phomochromenone G ( <b>4</b> )                                                  | 13 |
| <b>Figure S24.</b> UPLC analysis profile of ( <i>R</i> )- and ( <i>S</i> )- MPA esters of <b>2</b> and <b>3</b> | 14 |
| <b>Figure S25.</b> HR-ESI-MS of ( <i>R</i> )-MPA ester <b>2</b>                                                 | 14 |
| <b>Figure S26.</b> $^1\text{H}$ -NMR of ( <i>R</i> )-MPA ester <b>2</b>                                         | 15 |
| <b>Figure S27.</b> $^1\text{H}$ - $^1\text{H}$ COSY of ( <i>R</i> )-MPA ester <b>2</b>                          | 15 |
| <b>Figure S28.</b> HR-ESI-MS of ( <i>S</i> )-MPA ester <b>2</b>                                                 | 16 |
| <b>Figure S29.</b> $^1\text{H}$ -NMR of ( <i>S</i> )-MPA ester <b>2</b>                                         | 16 |
| <b>Figure S30.</b> $^1\text{H}$ - $^1\text{H}$ COSY of ( <i>S</i> )-MPA ester <b>2</b>                          | 17 |

|                                                                                                                                                                         |    |
|-------------------------------------------------------------------------------------------------------------------------------------------------------------------------|----|
| <b>Figure S31.</b> HR-ESI-MS of ( <i>R</i> )-MPA ester <b>3</b> -----                                                                                                   | 17 |
| <b>Figure S32.</b> <sup>1</sup> H-NMR of ( <i>R</i> )-MPA ester <b>3</b> -----                                                                                          | 18 |
| <b>Figure S33.</b> <sup>1</sup> H- <sup>1</sup> H COSY of ( <i>R</i> )-MPA ester <b>3</b> -----                                                                         | 18 |
| <b>Figure S34.</b> HR-ESI-MS of ( <i>S</i> )-MPA ester <b>3</b> -----                                                                                                   | 19 |
| <b>Figure S35.</b> <sup>1</sup> H-NMR of ( <i>S</i> )-MPA ester <b>3</b> -----                                                                                          | 19 |
| <b>Figure S36.</b> <sup>1</sup> H- <sup>1</sup> H COSY of ( <i>S</i> )-MPA ester <b>3</b> -----                                                                         | 20 |
| <b>Table S1.</b> Gibbs free energies <sup>a</sup> and equilibrium populations <sup>b</sup> of low-energy conformers of phomochromenone D ( <b>1</b> )-----              | 20 |
| <b>Table S2.</b> Cartesian coordinates for the low-energy reoptimized MMFF conformers of phomochromenone D ( <b>1</b> ) at B3LYP/6-31G(d,p) level of theory in gas----- | 20 |
| <b>Table S3.</b> Gibbs free energies <sup>a</sup> and equilibrium populations <sup>b</sup> of low-energy conformers of phomochromenone G ( <b>4</b> )-----              | 26 |
| <b>Table S4.</b> Cartesian coordinates for the low-energy reoptimized MMFF conformers of phomochromenone G ( <b>4</b> ) at B3LYP/6-31G(d,p) level of theory in gas----- | 26 |

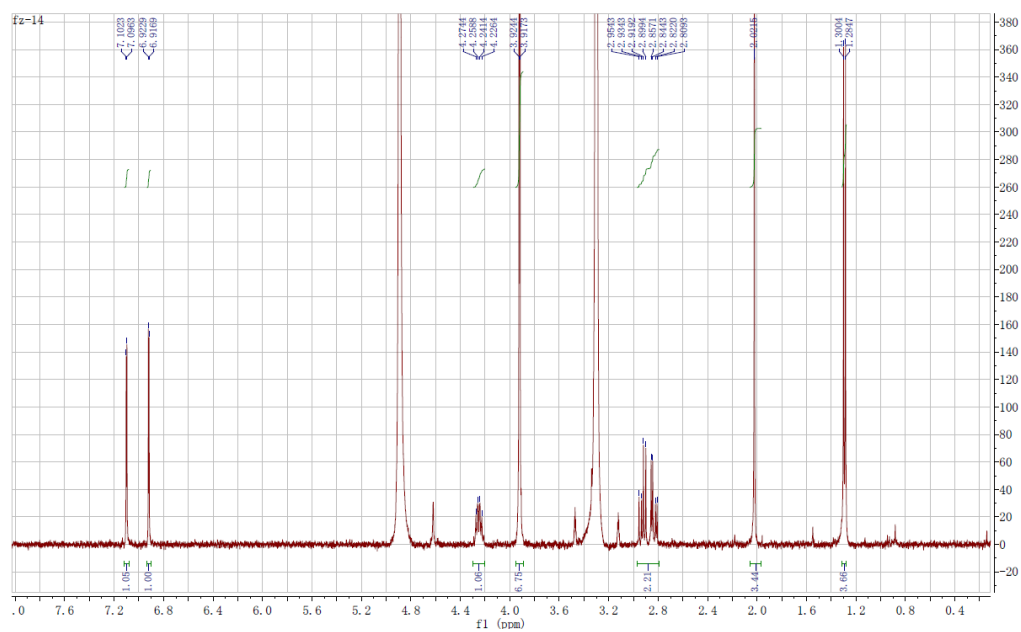

**Figure S1.**  $^1\text{H}$ -NMR of phomochromenone D (1)

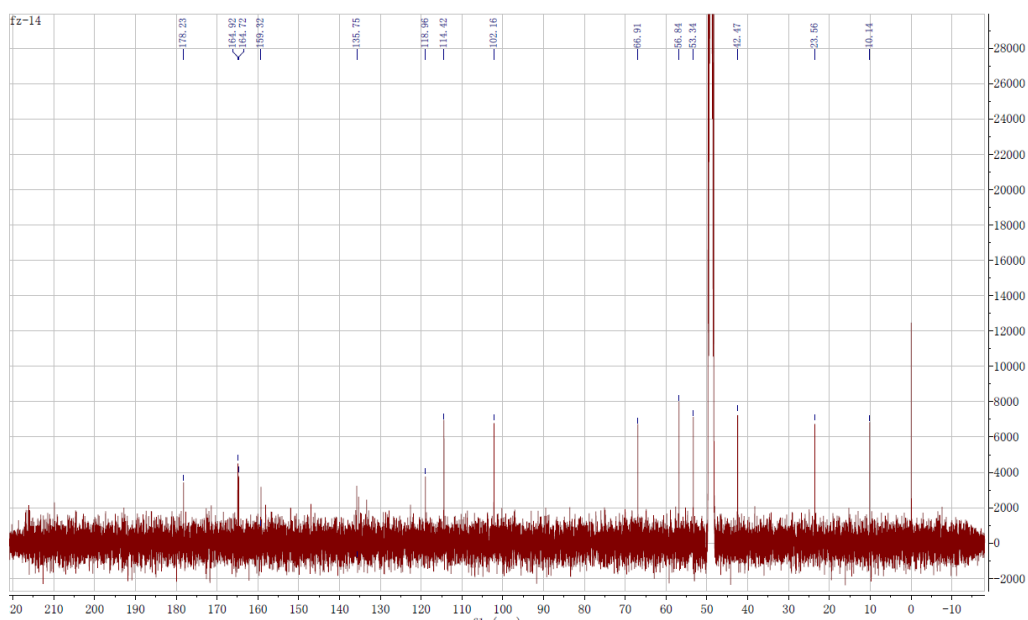

**Figure S2.**  $^{13}\text{C}$ -NMR of phomochromenone D (1)

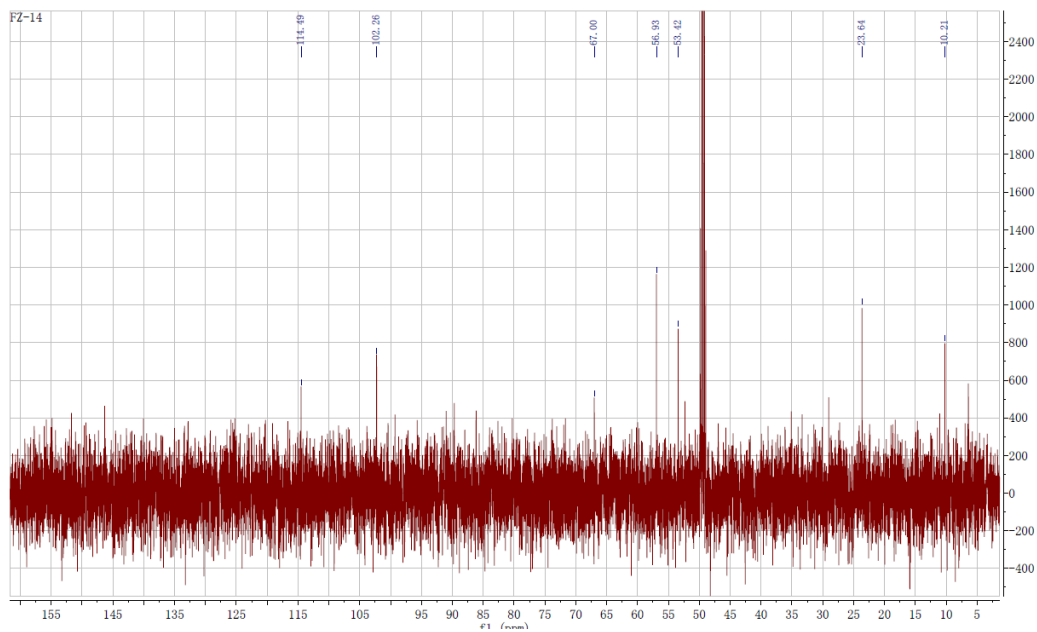

**Figure S3.** DEPT of phomochromenone D (**1**)

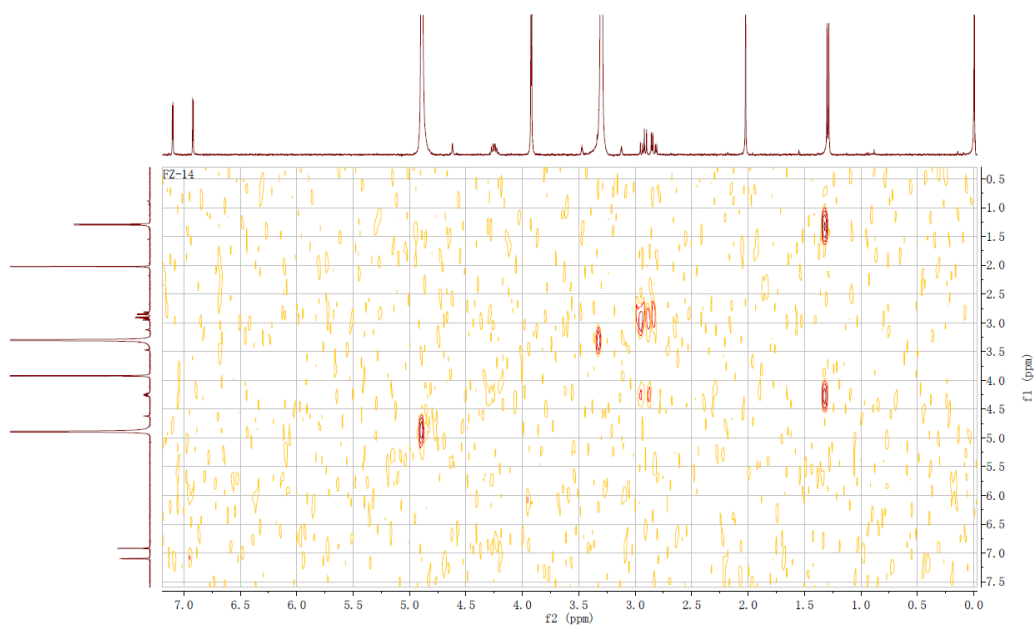

**Figure S4.**  $^1\text{H}$ - $^1\text{H}$  COSY of phomochromenone D (**1**)

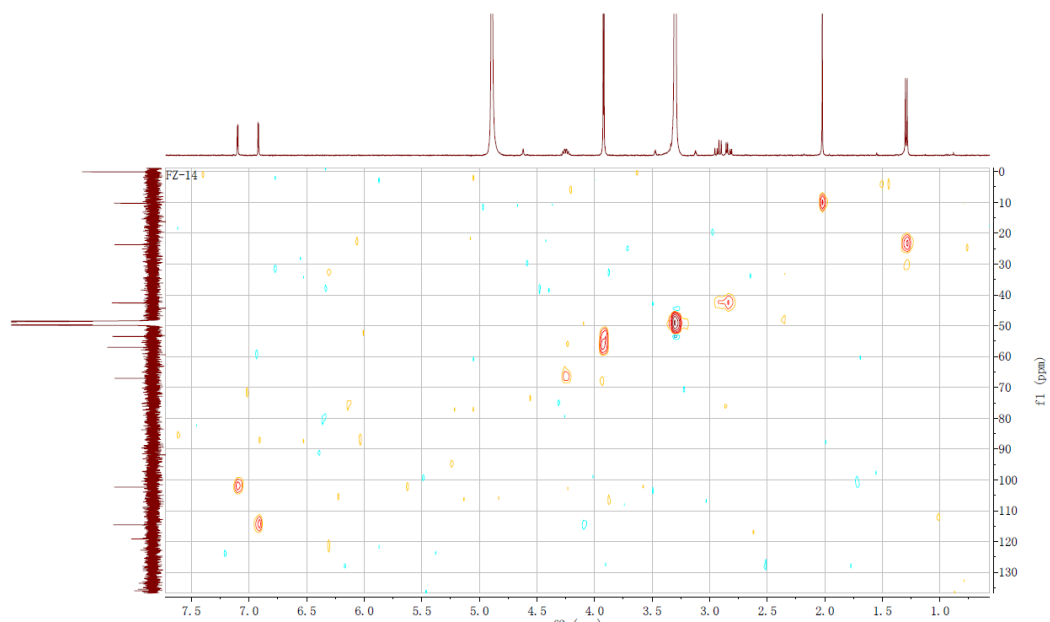

**Figure S5.** HMQC of phomochromenone D (**1**)

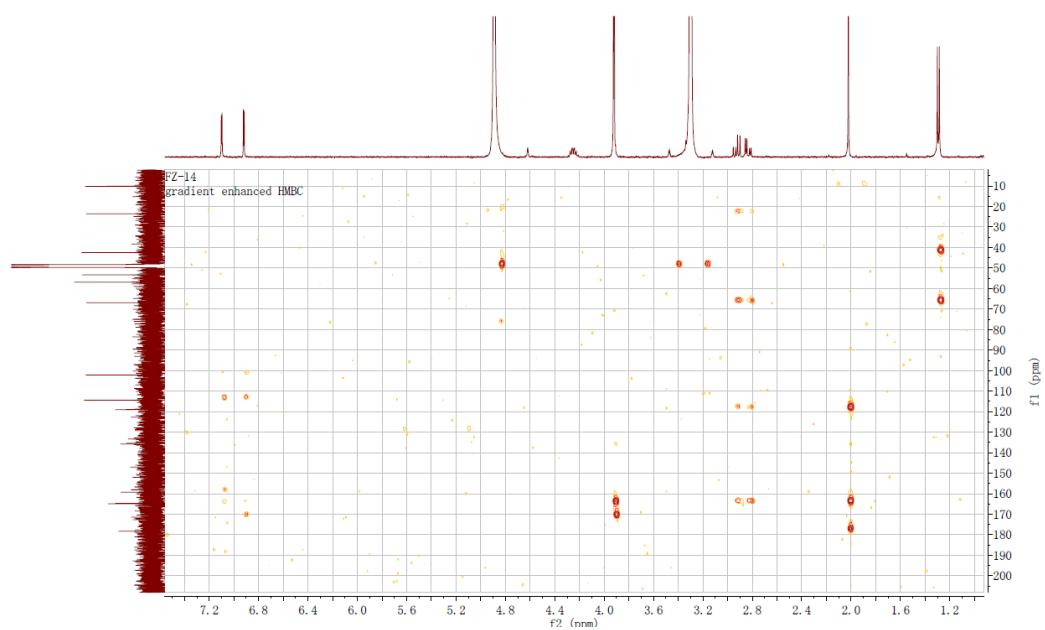

**Figure S6.** HMBC of phomochromenone D (**1**)

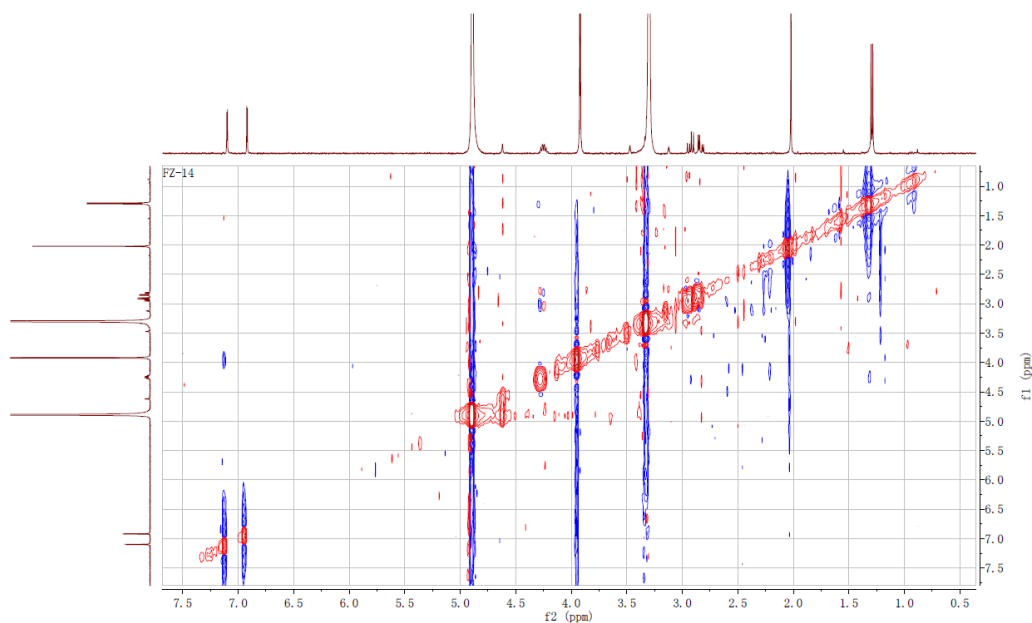

**Figure S7.** NOESY of phomochromenone D (**1**)

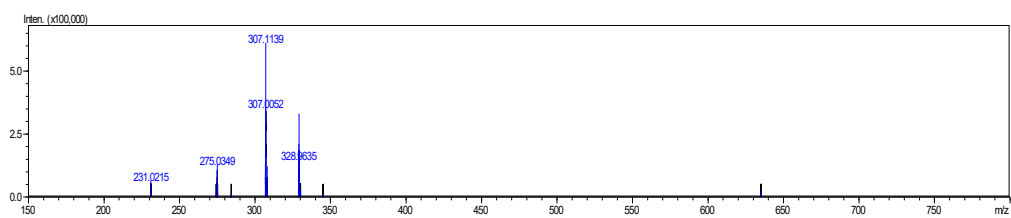

**Figure S8.** HR-ESI-MS of phomochromenone D (**1**)

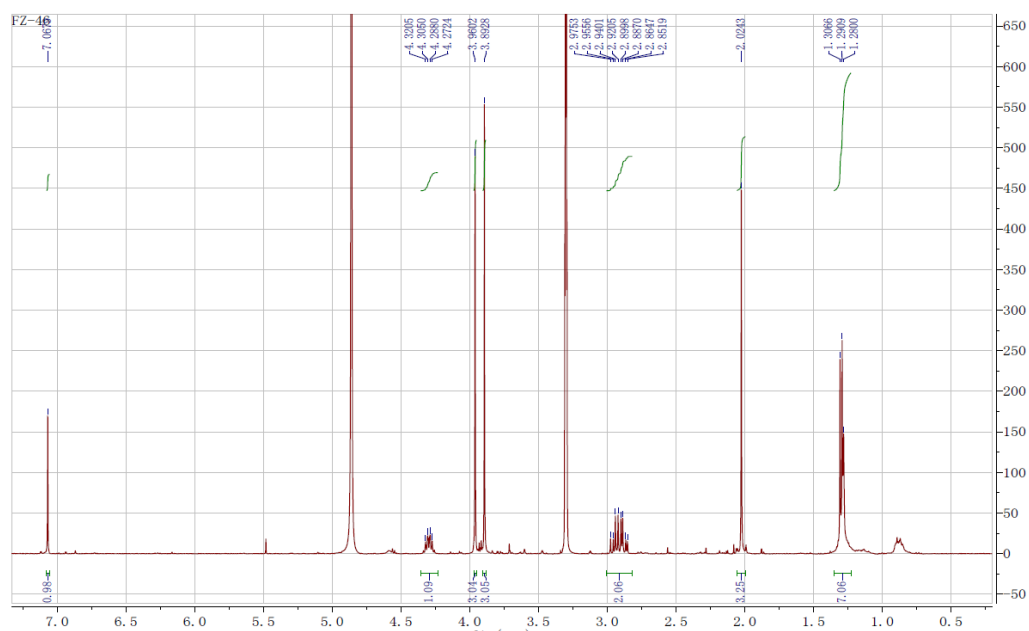

**Figure S9.**  $^1\text{H}$ -NMR of phomochromenones E (**2**) and F (**3**)

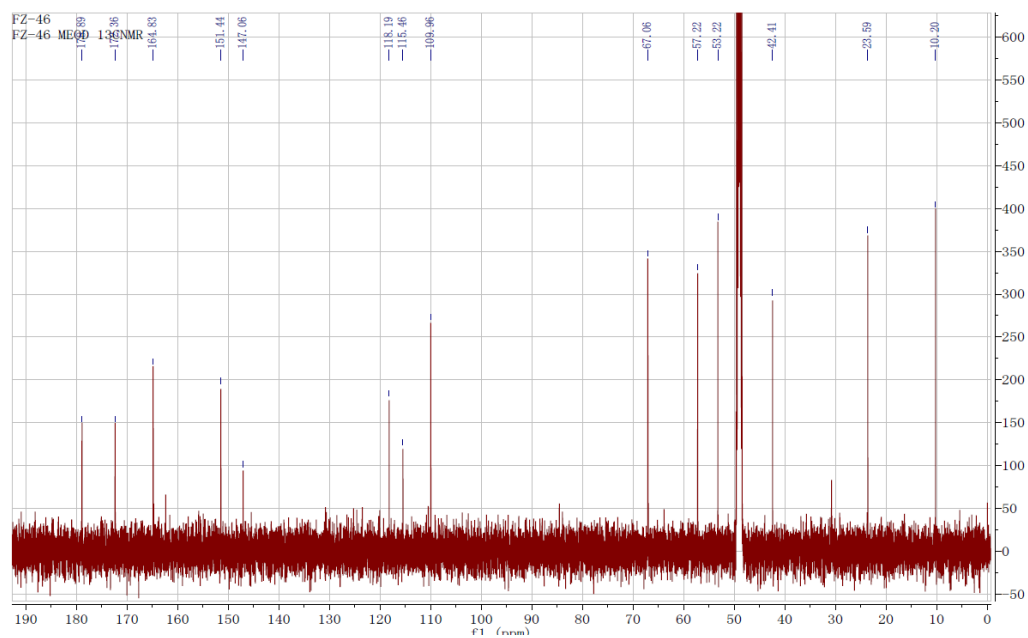

**Figure S10.**  $^{13}\text{C}$ -NMR of phomochromenones E (2) and F (3)

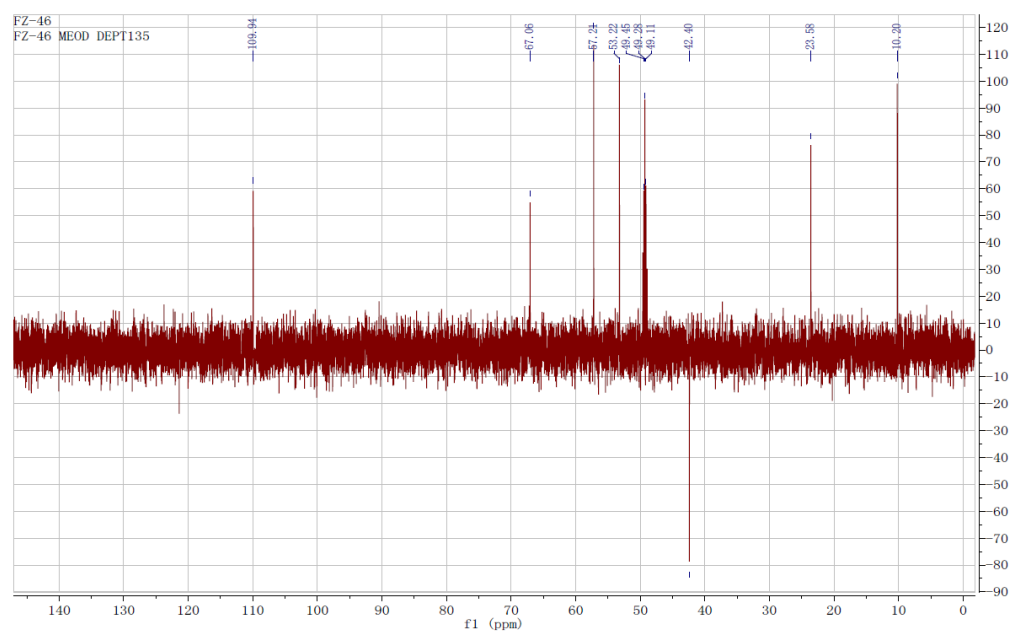

**Figure S11.** DEPT of phomochromenones E (2) and F (3)



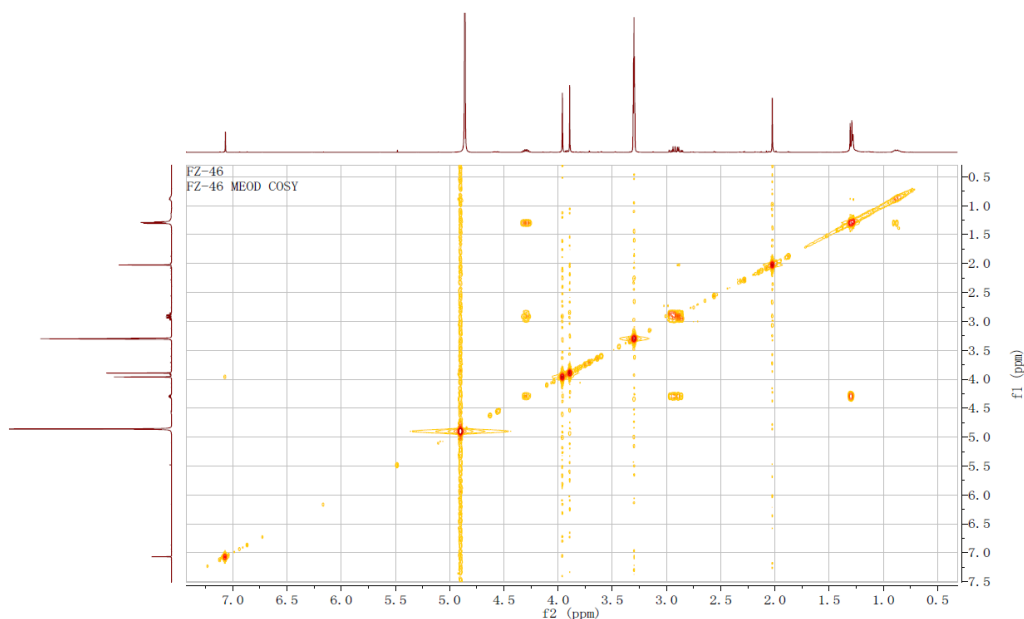

**Figure S12.**  $^1\text{H}$ - $^1\text{H}$  COSY of phomochromenones E (2) and F (3)

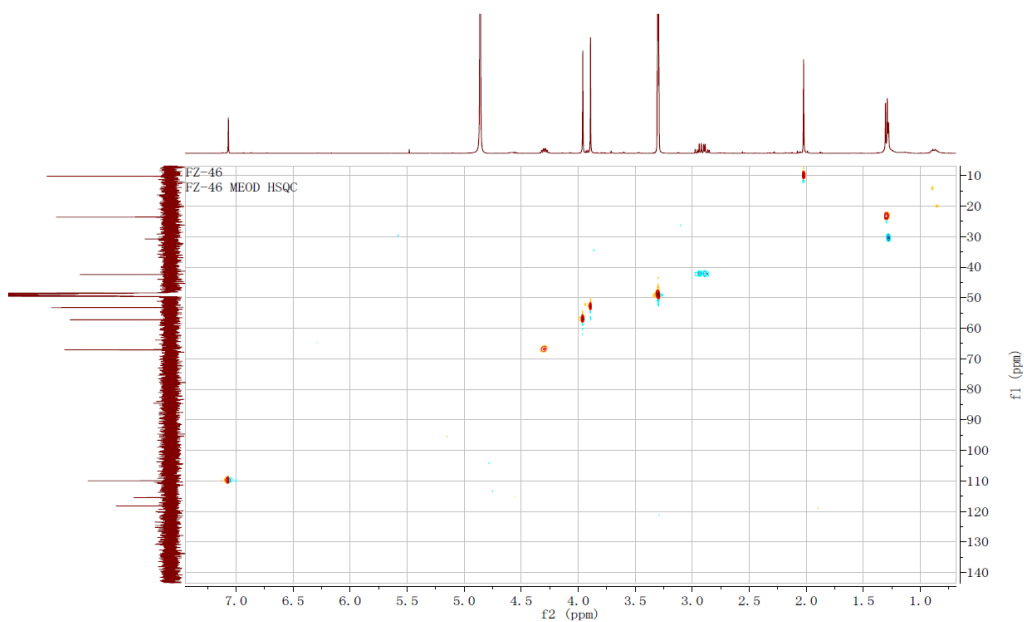

**Figure S13.** HMQC of phomochromenones E (2) and F (3)

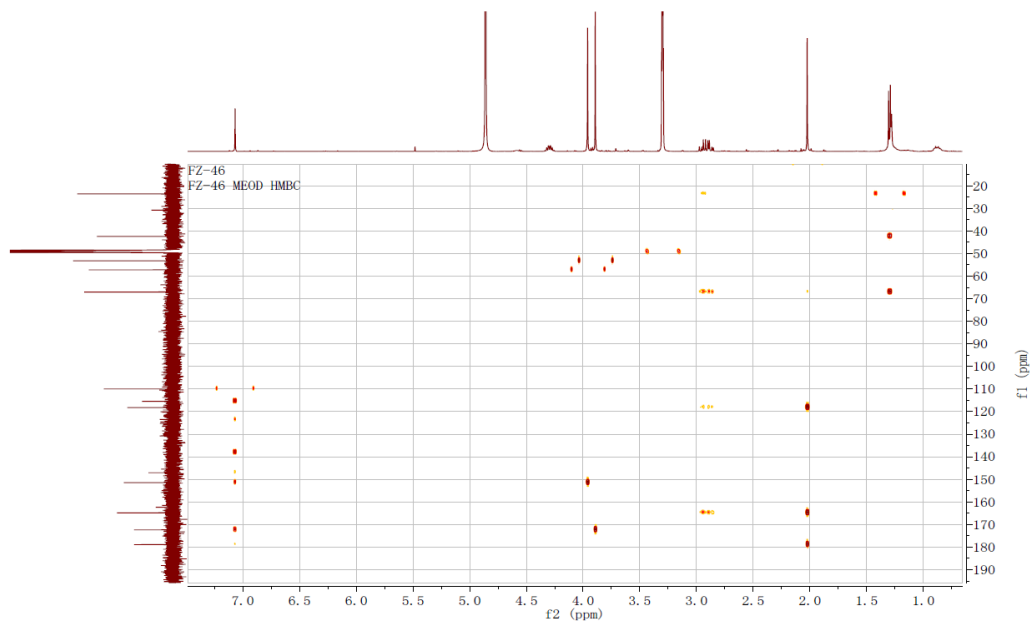

**Figure S14.** HMBC of phomochromenones E (2) and F (3)

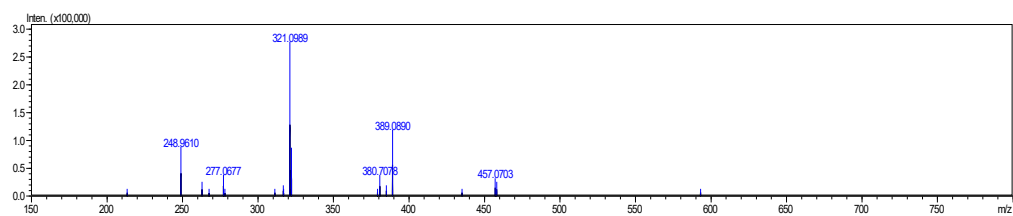

**Figure S15.** HR-ESI-MS of phomochromenones E (2) and F (3)

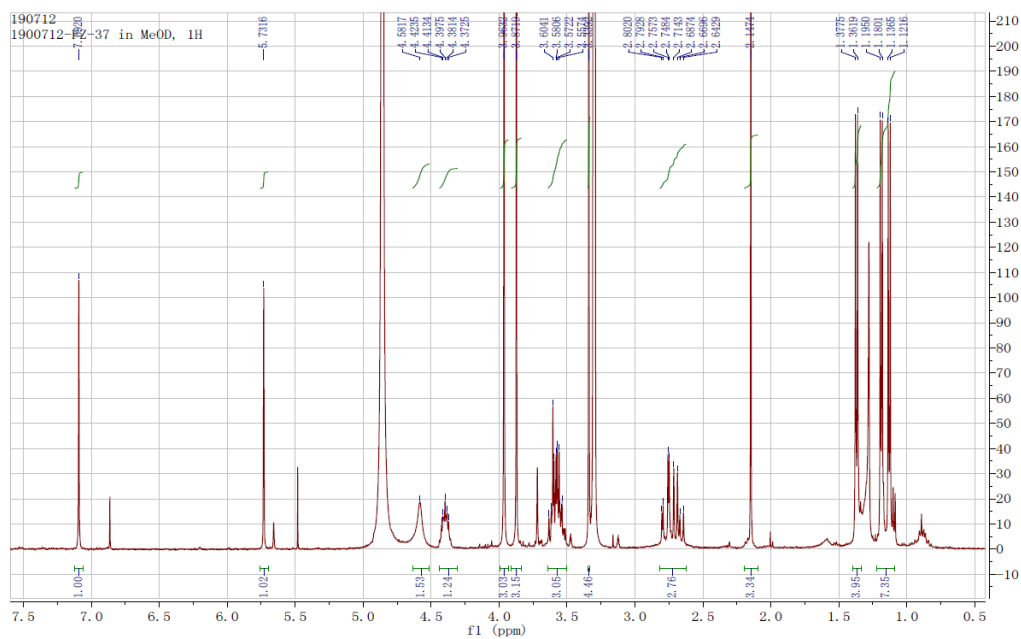

**Figure S16.**  $^1\text{H}$ -NMR of phomochromenone G (4)

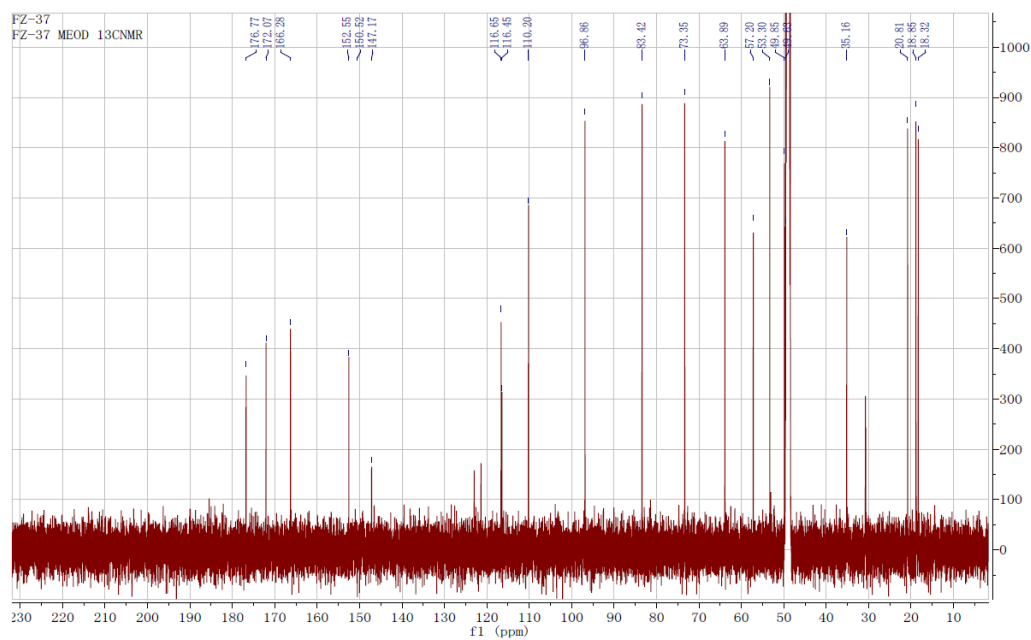

**Figure S17.**  $^{13}\text{C}$ -NMR of phomochromenone G (**4**)

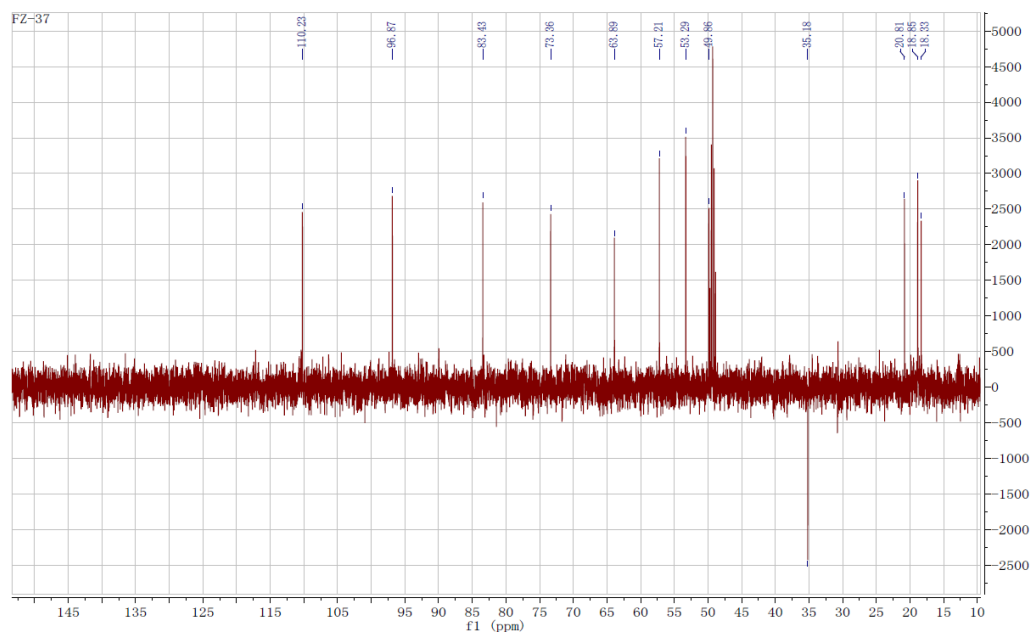

**Figure S18.** DEPT of phomochromenone G (**4**)

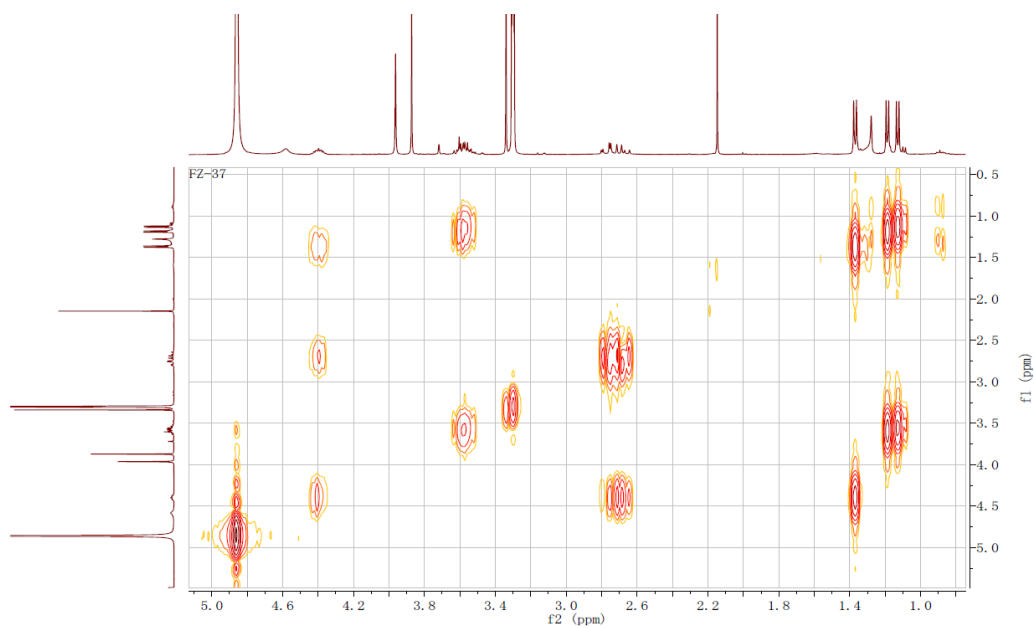

**Figure S19.**  $^1\text{H}$ - $^1\text{H}$  COSY of phomochromenone G (4)

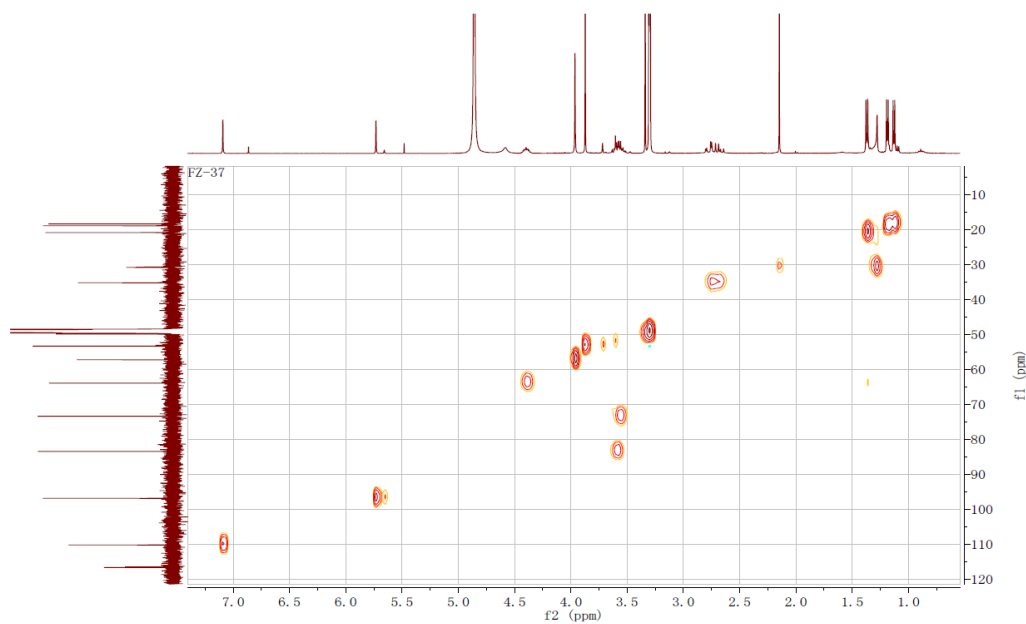

**Figure S20.** HMQC of phomochromenone G (4)

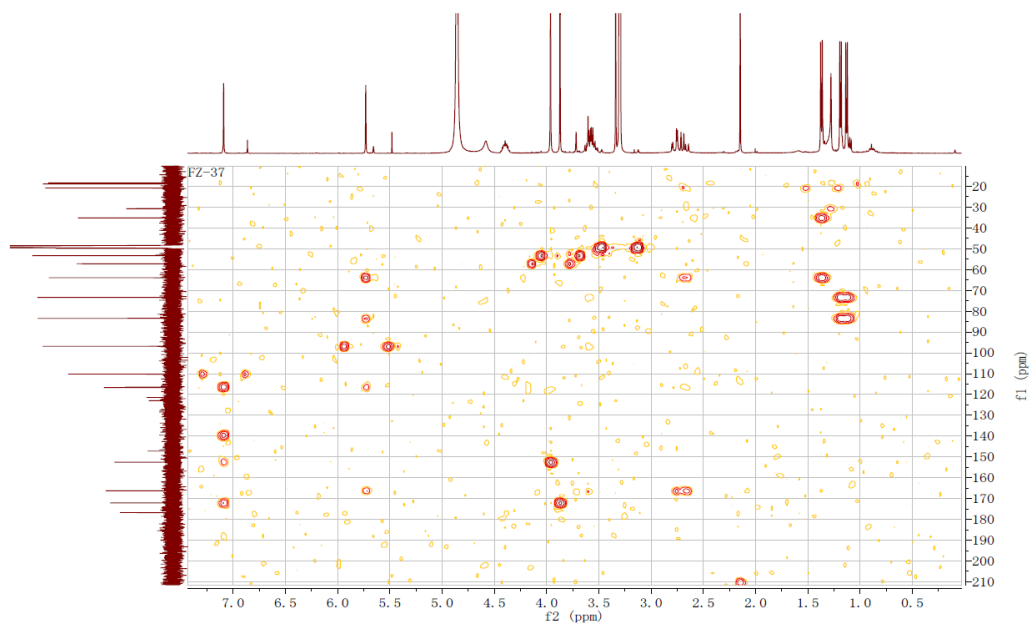

**Figure S21.** HMBC of phomochromenone G (4)

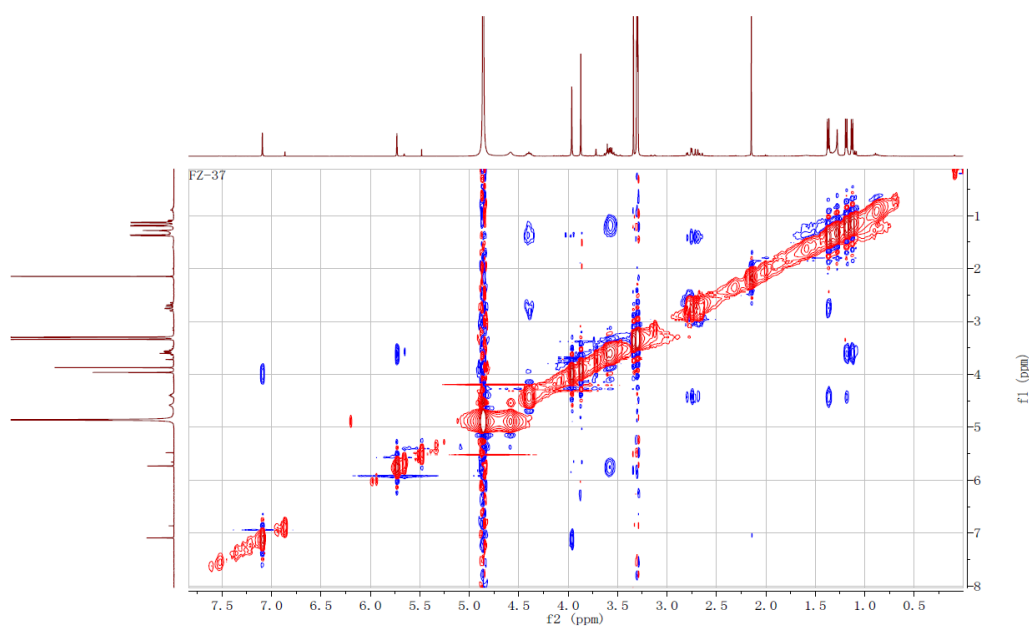

**Figure S22.** NOESY of phomochromenone G (4)

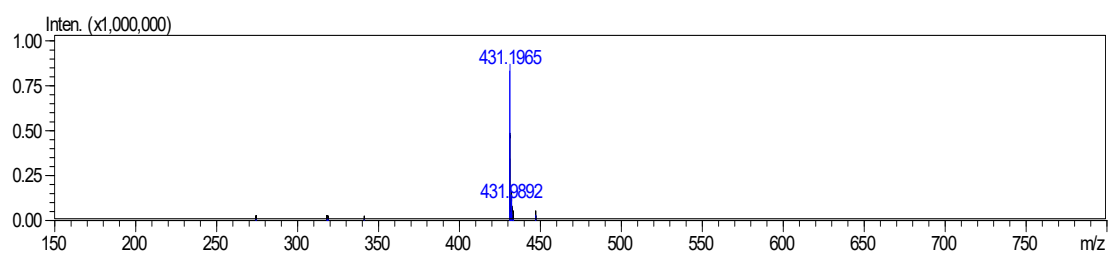

**Figure S23.** HR-ESI-MS of phomochromenone G (4)

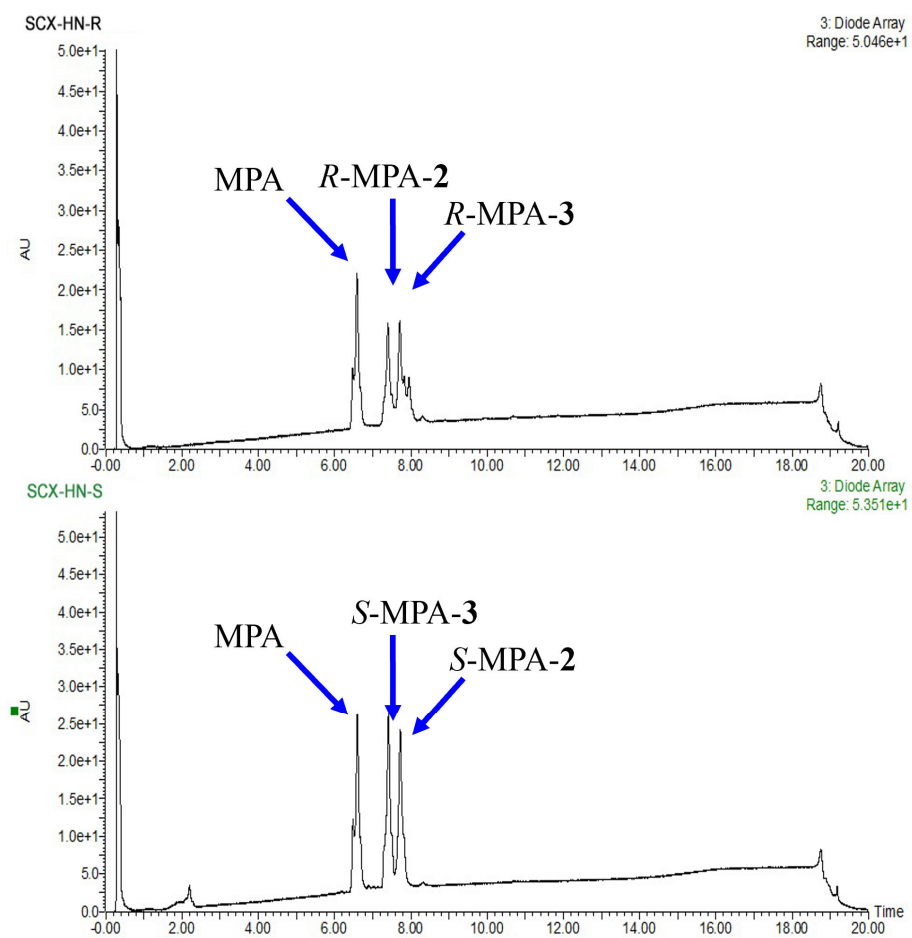

**Figure S24.** UPLC analysis profile of (*R*)- and (*S*)- MPA esters of **2** and **3**

20210309-SCX-XN-1\_210309085943 #30 RT: 0.43 AV: 1 NL: 6.61E6

T: FTMS + c ESI Full ms [150.00-2000.00]

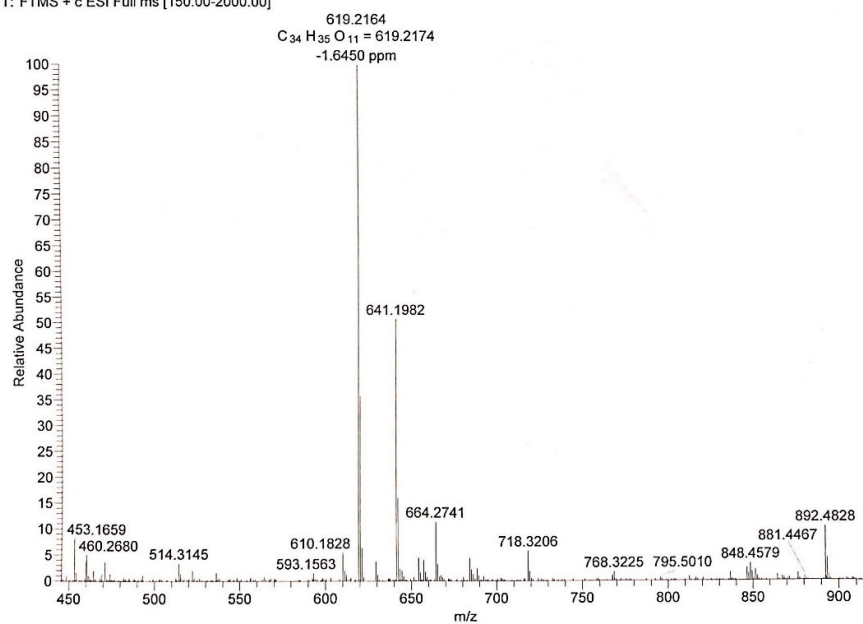

Figure S25. HR-ESI-MS of (R)-MPA ester 2

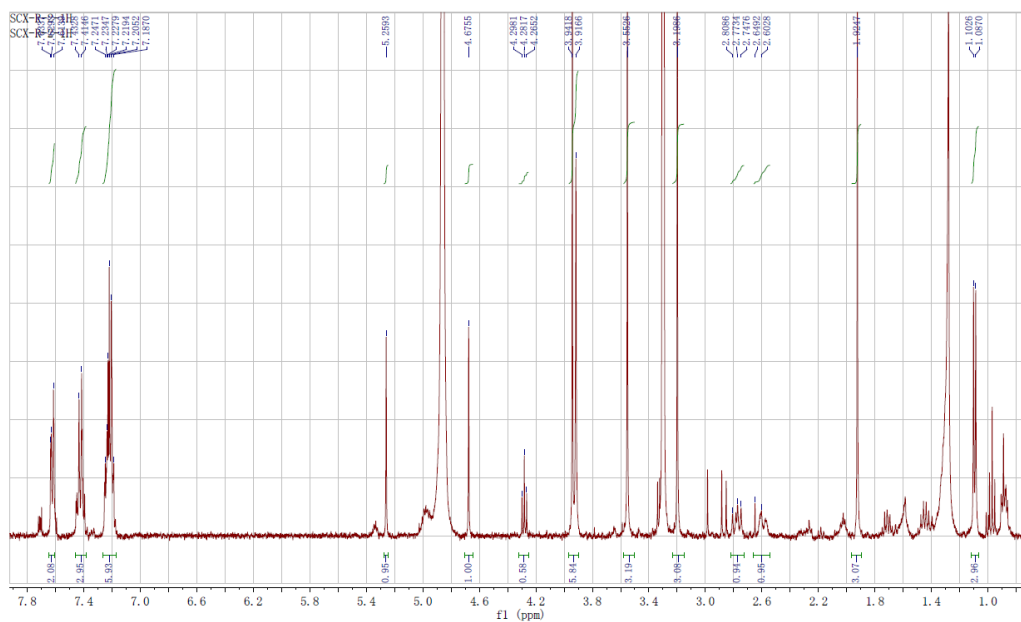Figure S26. <sup>1</sup>H-NMR of (R)-MPA ester 2

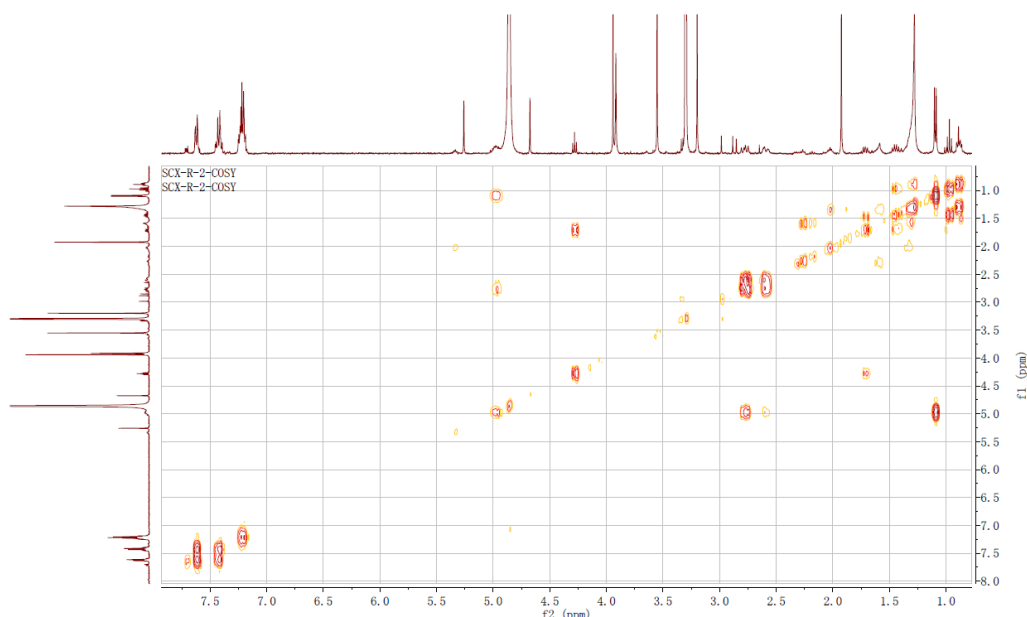

**Figure S27.**  $^1\text{H}$ - $^1\text{H}$  COSY of (*R*)-MPA ester **2**

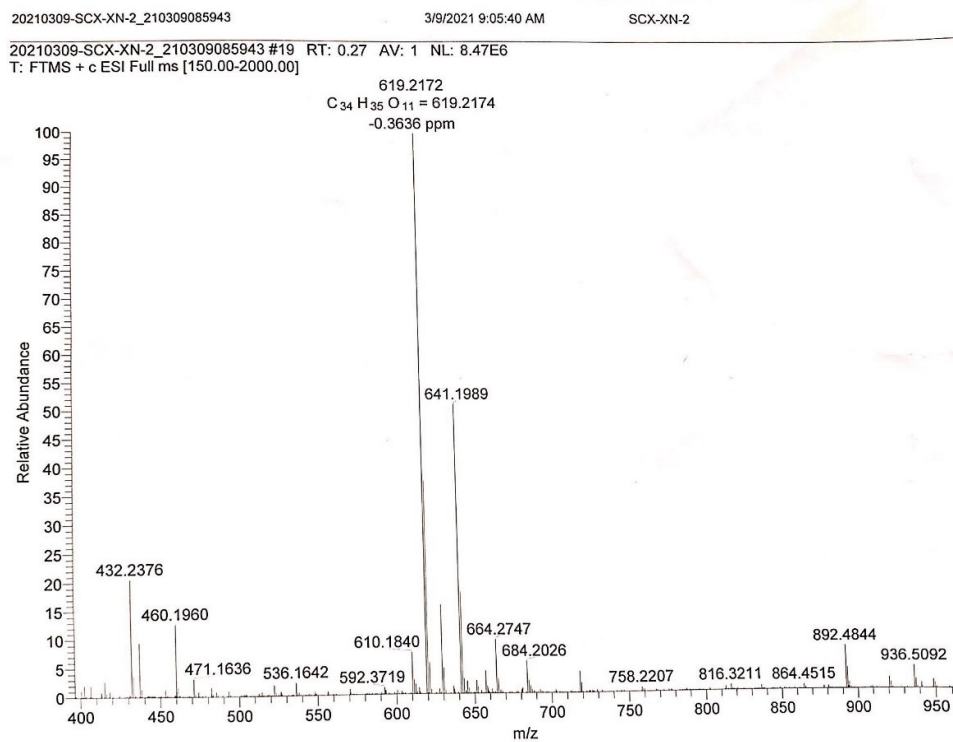

**Figure S28.** HR-ESI-MS of (*S*)-MPA ester **2**



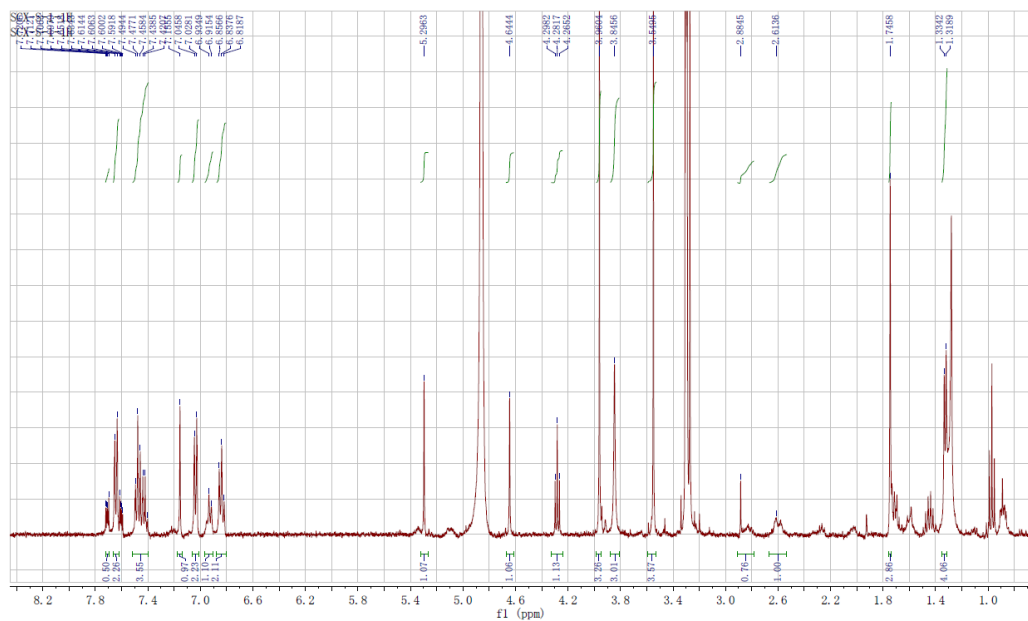

**Figure S29.**  $^1\text{H}$ -NMR of (*S*)-MPA ester **2**

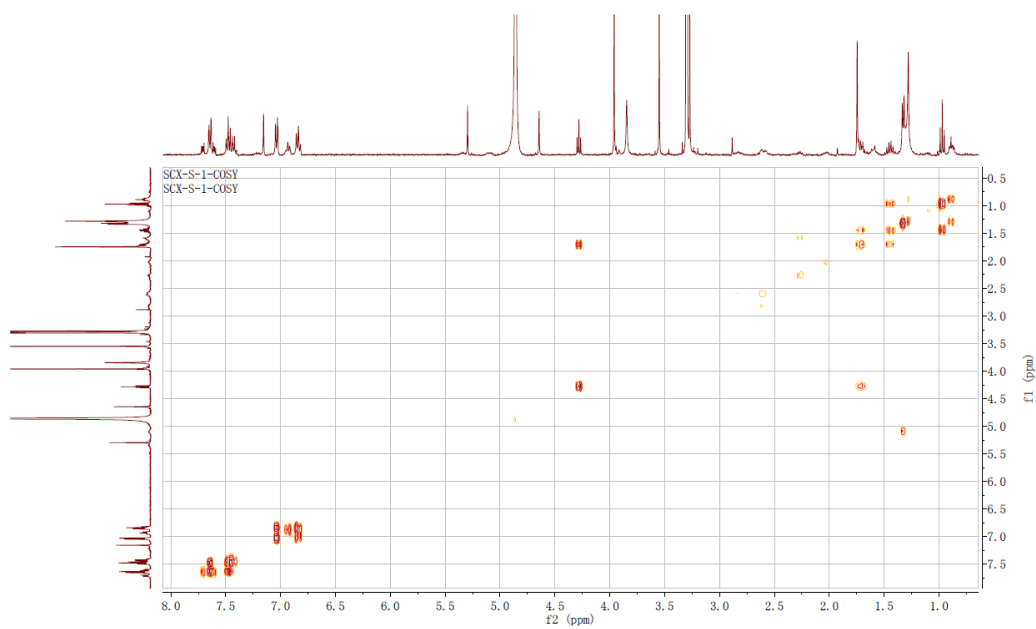

**Figure S30.**  $^1\text{H}$ - $^1\text{H}$  COSY of (*S*)-MPA ester **2**

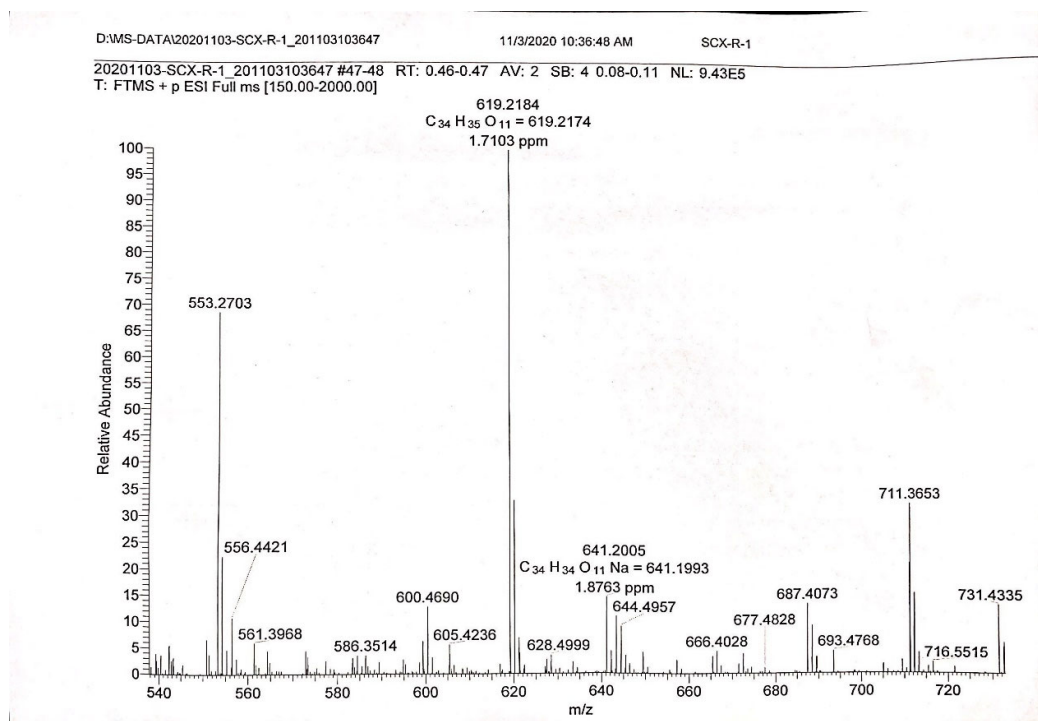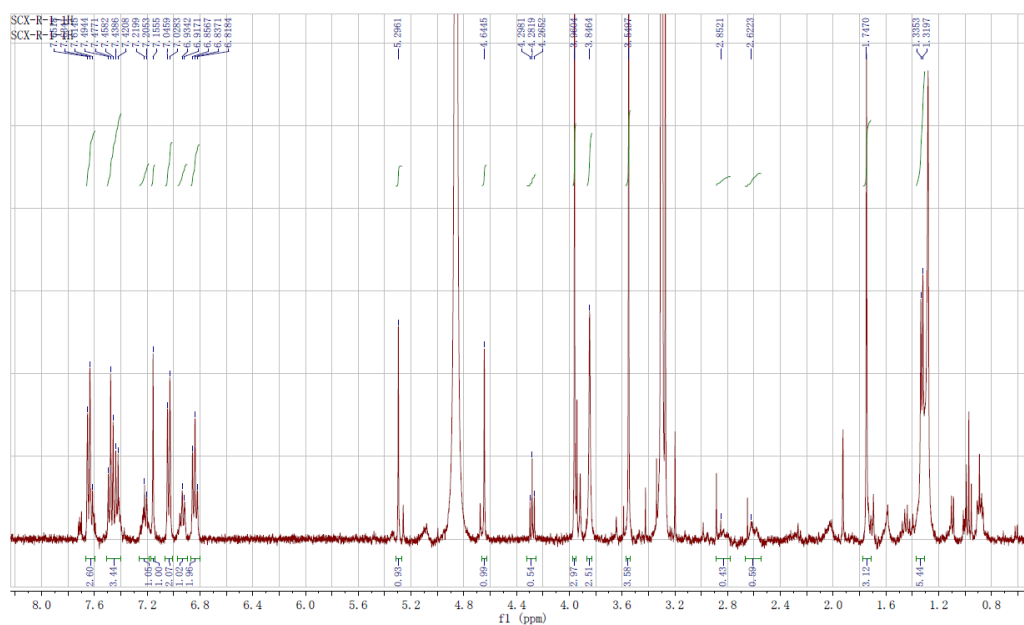

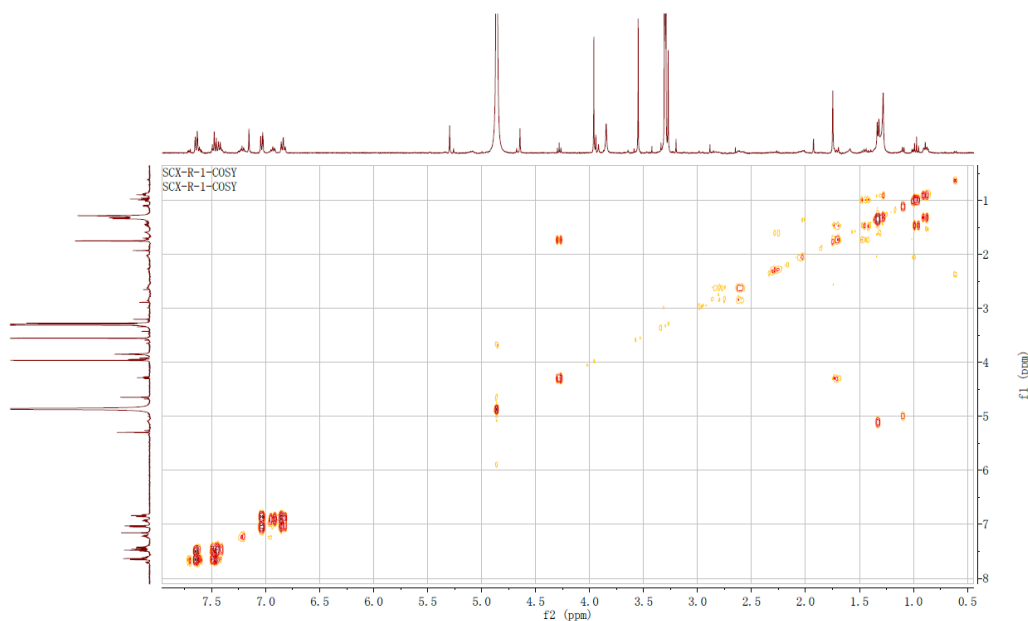

**Figure S33.**  $^1\text{H}$ - $^1\text{H}$  COSY of (*R*)-MPA ester **3**

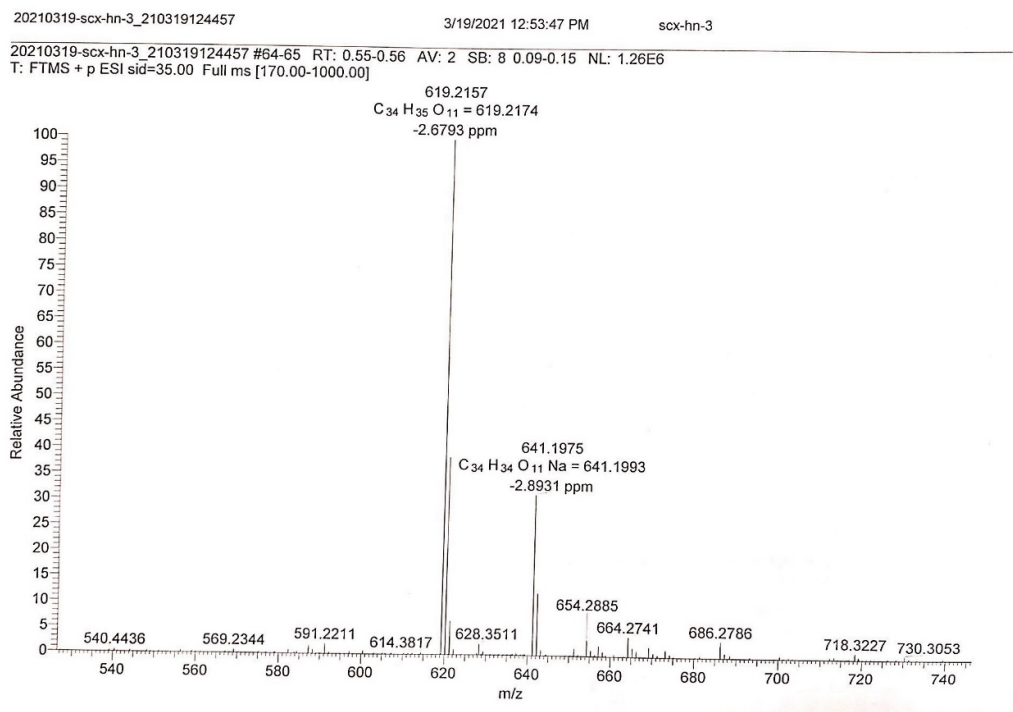

**Figure S34.** HR-ESI-MS of (*S*)-MPA ester **3**

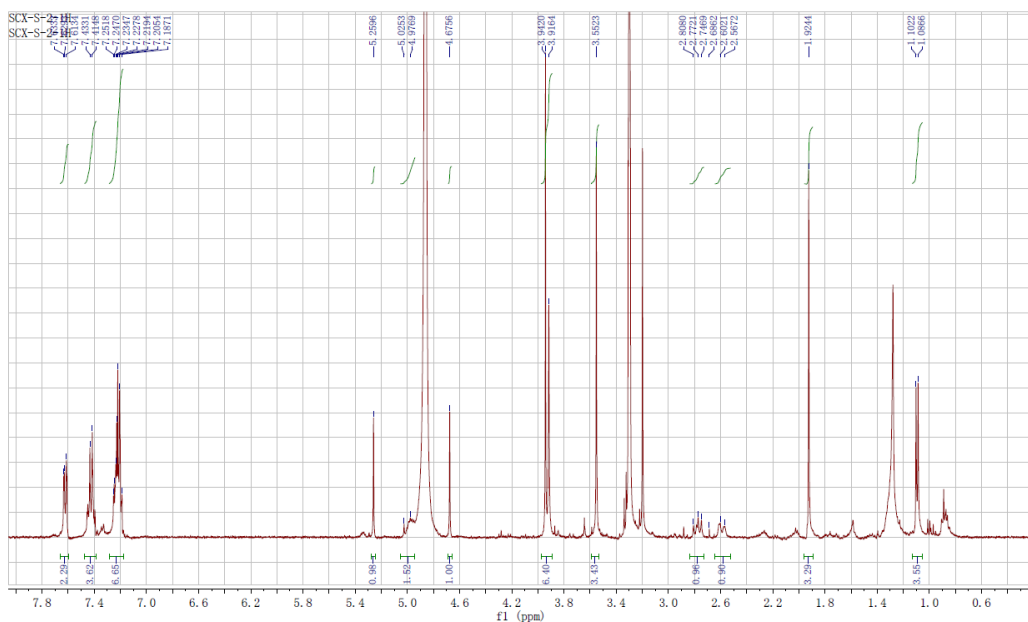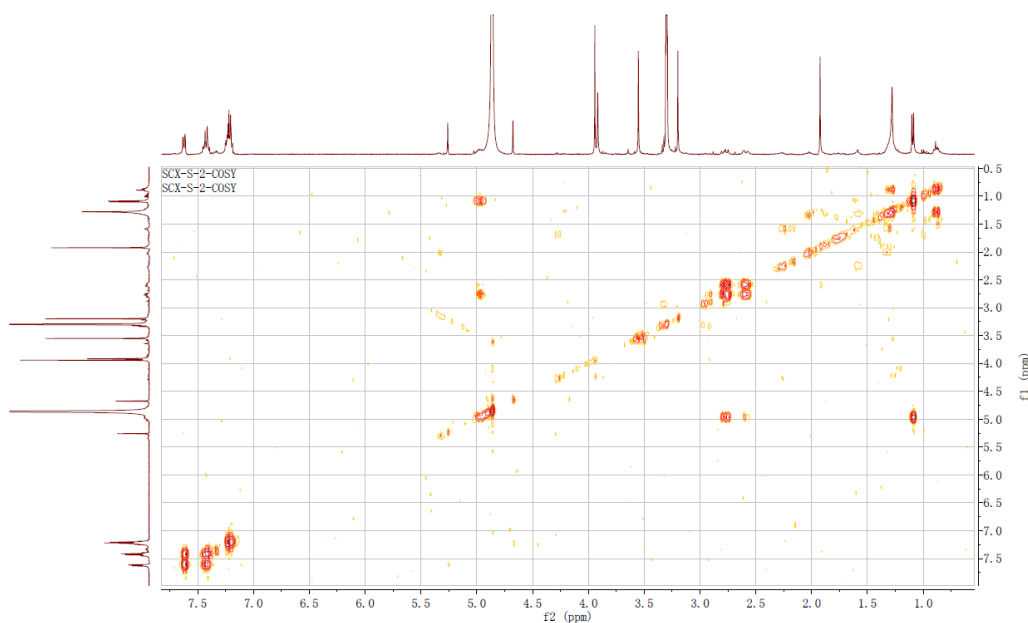

**Figure S36.**  $^1\text{H}$ - $^1\text{H}$  COSY of (*S*)-MPA ester **3**

**Table S1.**Gibbs free energies<sup>a</sup> and equilibrium populations<sup>b</sup> of low-energy conformers of phomochromenone D (**1**).

| Conformers | In gas           |                      |
|------------|------------------|----------------------|
|            | $G^a$            | $P$ (%) <sup>b</sup> |
| <b>1-1</b> | -672458.42332812 | 9.81                 |
| <b>1-2</b> | -672458.48607912 | 10.90                |
| <b>1-3</b> | -672458.92847367 | 23.02                |
| <b>1-4</b> | -672459.28552686 | 42.08                |
| <b>1-5</b> | -672458.6417016  | 14.18                |

**Table S2.** Cartesian coordinates for the low-energy reoptimized MMFF conformers of phomochromenone D (**1**) at B3LYP/6-31G(d,p) level of theory in gas

Conformer **1-1**

| <b>1-1</b>       |                  | Standard Orientation<br>(Ångstroms) |           |           |           |
|------------------|------------------|-------------------------------------|-----------|-----------|-----------|
| Center<br>number | Atomic<br>number | Atomic<br>Type                      | X         | Y         | Z         |
| 1.               | 6.               | 0.                                  | -0.491833 | 3.153694  | -0.217427 |
| 2.               | 6.               | 0.                                  | -0.505483 | 2.877390  | 1.163643  |
| 3.               | 6.               | 0.                                  | -0.272400 | 1.580240  | 1.621524  |
| 4.               | 6.               | 0.                                  | -0.023569 | 0.578458  | 0.689750  |
| 5.               | 6.               | 0.                                  | 0.022668  | 0.823512  | -0.692490 |
| 6.               | 6.               | 0.                                  | -0.225901 | 2.139556  | -1.133144 |
| 7.               | 8.               | 0.                                  | 0.182271  | -0.676358 | 1.188370  |
| 8.               | 6.               | 0.                                  | 0.404055  | -1.732413 | 0.343672  |
| 9.               | 6.               | 0.                                  | 0.463344  | -1.608616 | -1.005926 |
| 10.              | 6.               | 0.                                  | 0.310854  | -0.281284 | -1.619454 |
| 11.              | 6.               | 0.                                  | 0.559449  | -2.995344 | 1.139508  |
| 12.              | 6.               | 0.                                  | -0.777584 | -3.564109 | 1.644978  |
| 13.              | 8.               | 0.                                  | -1.510172 | -3.942434 | 0.480235  |
| 14.              | 6.               | 0.                                  | 0.689263  | -2.784687 | -1.923254 |
| 15.              | 8.               | 0.                                  | 0.425792  | -0.090794 | -2.835528 |
| 16.              | 6.               | 0.                                  | -0.355194 | 2.512472  | -2.600096 |
| 17.              | 8.               | 0.                                  | 0.747322  | 2.887438  | -3.281738 |
| 18.              | 8.               | 0.                                  | -1.446119 | 2.634433  | -3.102799 |
| 19.              | 8.               | 0.                                  | -0.745239 | 3.805988  | 2.123992  |
| 20.              | 6.               | 0.                                  | -1.027088 | 5.144660  | 1.728466  |
| 21.              | 6.               | 0.                                  | 2.055211  | 2.597843  | -2.774806 |
| 22.              | 6.               | 0.                                  | -0.569321 | -4.753499 | 2.582392  |
| 23.              | 1.               | 0.                                  | -0.708346 | 4.149146  | -0.583948 |
| 24.              | 1.               | 0.                                  | -0.295491 | 1.358635  | 2.681481  |
| 25.              | 1.               | 0.                                  | 1.054097  | -3.758463 | 0.534049  |
| 26.              | 1.               | 0.                                  | 1.198352  | -2.781796 | 2.003699  |
| 27.              | 1.               | 0.                                  | -1.308980 | -2.764608 | 2.184862  |
| 28.              | 1.               | 0.                                  | -2.398536 | -4.205773 | 0.752877  |
| 29.              | 1.               | 0.                                  | 1.712577  | -3.171692 | -1.846537 |
| 30.              | 1.               | 0.                                  | 0.537076  | -2.455366 | -2.952214 |
| 31.              | 1.               | 0.                                  | -0.003167 | -3.599077 | -1.698489 |
| 32.              | 1.               | 0.                                  | -1.192261 | 5.697516  | 2.653588  |
| 33.              | 1.               | 0.                                  | -1.928569 | 5.198943  | 1.107213  |
| 34.              | 1.               | 0.                                  | -0.184480 | 5.590076  | 1.186349  |

|     |    |    |           |           |           |
|-----|----|----|-----------|-----------|-----------|
| 35. | 1. | 0. | 2.252651  | 1.526300  | -2.844908 |
| 36. | 1. | 0. | 2.175137  | 2.937678  | -1.741381 |
| 37. | 1. | 0. | 2.745531  | 3.146855  | -3.416524 |
| 38. | 1. | 0. | -0.016624 | -5.549329 | 2.073067  |
| 39. | 1. | 0. | -1.533131 | -5.163079 | 2.904893  |
| 40. | 1. | 0. | -0.016163 | -4.461111 | 3.481055  |

### Conformer 1-2

| 1-2              |                | Standard Orientation<br>(Ångstroms) |           |           |           |
|------------------|----------------|-------------------------------------|-----------|-----------|-----------|
| Center<br>number | Atom<br>number | Type                                | X         | Y         | Z         |
| 1.               | 6.             | 0.                                  | -0.011457 | 3.249896  | -0.202102 |
| 2.               | 6.             | 0.                                  | 0.008252  | 2.968237  | 1.177726  |
| 3.               | 6.             | 0.                                  | 0.223114  | 1.663860  | 1.623890  |
| 4.               | 6.             | 0.                                  | 0.405572  | 0.657896  | 0.681331  |
| 5.               | 6.             | 0.                                  | 0.367211  | 0.899030  | -0.701917 |
| 6.               | 6.             | 0.                                  | 0.161768  | 2.226614  | -1.129783 |
| 7.               | 8.             | 0.                                  | 0.635561  | -0.596758 | 1.169920  |
| 8.               | 6.             | 0.                                  | 0.837734  | -1.648764 | 0.316147  |
| 9.               | 6.             | 0.                                  | 0.800801  | -1.531785 | -1.034841 |
| 10.              | 6.             | 0.                                  | 0.541413  | -0.218318 | -1.642269 |
| 11.              | 6.             | 0.                                  | 1.085315  | -2.902743 | 1.102518  |
| 12.              | 6.             | 0.                                  | -0.186601 | -3.482862 | 1.743129  |
| 13.              | 8.             | 0.                                  | -1.035562 | -3.864157 | 0.660453  |
| 14.              | 6.             | 0.                                  | 0.986683  | -2.709661 | -1.959230 |
| 15.              | 8.             | 0.                                  | 0.452904  | -0.053046 | -2.864244 |
| 16.              | 6.             | 0.                                  | 0.250997  | 2.652731  | -2.585144 |
| 17.              | 8.             | 0.                                  | -0.861993 | 2.628873  | -3.347328 |
| 18.              | 8.             | 0.                                  | 1.260366  | 3.163655  | -3.007058 |
| 19.              | 8.             | 0.                                  | -0.162550 | 3.901601  | 2.148126  |
| 20.              | 6.             | 0.                                  | -0.351288 | 5.260582  | 1.766765  |
| 21.              | 6.             | 0.                                  | -2.014517 | 1.881711  | -2.940840 |
| 22.              | 6.             | 0.                                  | 0.127861  | -4.672281 | 2.650146  |
| 23.              | 1.             | 0.                                  | -0.139237 | 4.264669  | -0.557105 |
| 24.              | 1.             | 0.                                  | 0.256389  | 1.443374  | 2.683816  |
| 25.              | 1.             | 0.                                  | 1.527751  | -3.664025 | 0.456069  |
| 26.              | 1.             | 0.                                  | 1.803965  | -2.674462 | 1.897768  |
| 27.              | 1.             | 0.                                  | -0.664774 | -2.688917 | 2.338254  |
| 28.              | 1.             | 0.                                  | -1.870952 | -4.179163 | 1.029293  |
| 29.              | 1.             | 0.                                  | 2.022058  | -3.070294 | -1.956547 |

|     |    |    |           |           |           |
|-----|----|----|-----------|-----------|-----------|
| 30. | 1. | 0. | 0.749199  | -2.391853 | -2.975608 |
| 31. | 1. | 0. | 0.333115  | -3.539433 | -1.679526 |
| 32. | 1. | 0. | -0.458254 | 5.816740  | 2.698448  |
| 33. | 1. | 0. | -1.258253 | 5.386805  | 1.163664  |
| 34. | 1. | 0. | 0.511411  | 5.646085  | 1.211157  |
| 35. | 1. | 0. | -2.318905 | 2.126431  | -1.918460 |
| 36. | 1. | 0. | -1.814548 | 0.812020  | -3.028592 |
| 37. | 1. | 0. | -2.808180 | 2.170652  | -3.631063 |
| 38. | 1. | 0. | 0.624625  | -5.465402 | 2.082404  |
| 39. | 1. | 0. | -0.792977 | -5.086149 | 3.076554  |
| 40. | 1. | 0. | 0.774982  | -4.378391 | 3.483080  |

### Conformer 1-3

| 1-3              |                | Standard Orientation<br>(Ångstroms) |           |           |           |
|------------------|----------------|-------------------------------------|-----------|-----------|-----------|
| Center<br>number | Atom<br>number | Type                                | X         | Y         | Z         |
| 1.               | 6.             | 0.                                  | -0.502871 | 3.139088  | -0.199626 |
| 2.               | 6.             | 0.                                  | -0.500320 | 2.881238  | 1.185469  |
| 3.               | 6.             | 0.                                  | -0.257775 | 1.590667  | 1.658390  |
| 4.               | 6.             | 0.                                  | -0.015783 | 0.578133  | 0.737312  |
| 5.               | 6.             | 0.                                  | 0.014527  | 0.805039  | -0.648726 |
| 6.               | 6.             | 0.                                  | -0.243605 | 2.114176  | -1.104682 |
| 7.               | 8.             | 0.                                  | 0.196155  | -0.671122 | 1.251053  |
| 8.               | 6.             | 0.                                  | 0.415865  | -1.738922 | 0.421612  |
| 9.               | 6.             | 0.                                  | 0.452173  | -1.632065 | -0.933140 |
| 10.              | 6.             | 0.                                  | 0.298378  | -0.310363 | -1.562581 |
| 11.              | 6.             | 0.                                  | 0.559223  | -2.995736 | 1.228119  |
| 12.              | 6.             | 0.                                  | -0.806398 | -3.607009 | 1.631602  |
| 13.              | 8.             | 0.                                  | -1.555040 | -3.998251 | 0.484157  |
| 14.              | 6.             | 0.                                  | 0.700913  | -2.808631 | -1.845899 |
| 15.              | 8.             | 0.                                  | 0.406882  | -0.141893 | -2.781705 |
| 16.              | 6.             | 0.                                  | -0.395951 | 2.462109  | -2.575758 |
| 17.              | 8.             | 0.                                  | 0.692072  | 2.840574  | -3.276925 |
| 18.              | 8.             | 0.                                  | -1.495156 | 2.556150  | -3.066024 |
| 19.              | 8.             | 0.                                  | -0.733277 | 3.820758  | 2.134913  |
| 20.              | 6.             | 0.                                  | -1.026988 | 5.153582  | 1.726117  |
| 21.              | 6.             | 0.                                  | 2.010227  | 2.579507  | -2.780203 |
| 22.              | 6.             | 0.                                  | -0.627284 | -4.855118 | 2.484981  |
| 23.              | 1.             | 0.                                  | -0.727658 | 4.128875  | -0.576325 |
| 24.              | 1.             | 0.                                  | -0.269302 | 1.383050  | 2.721325  |

|     |    |    |           |           |           |
|-----|----|----|-----------|-----------|-----------|
| 25. | 1. | 0. | 1.121656  | -3.741223 | 0.661236  |
| 26. | 1. | 0. | 1.125645  | -2.759168 | 2.135652  |
| 27. | 1. | 0. | -1.362363 | -2.850174 | 2.207454  |
| 28. | 1. | 0. | -1.761364 | -3.203698 | -0.027366 |
| 29. | 1. | 0. | 1.771914  | -3.030729 | -1.928784 |
| 30. | 1. | 0. | 0.348983  | -2.554690 | -2.847338 |
| 31. | 1. | 0. | 0.189423  | -3.708615 | -1.500153 |
| 32. | 1. | 0. | -1.183638 | 5.716547  | 2.646459  |
| 33. | 1. | 0. | -1.936394 | 5.194931  | 1.115700  |
| 34. | 1. | 0. | -0.193127 | 5.595940  | 1.168456  |
| 35. | 1. | 0. | 2.222205  | 1.509573  | -2.830581 |
| 36. | 1. | 0. | 2.137939  | 2.942829  | -1.755813 |
| 37. | 1. | 0. | 2.684807  | 3.123961  | -3.442015 |
| 38. | 1. | 0. | -0.068356 | -5.616267 | 1.931208  |
| 39. | 1. | 0. | -1.603158 | -5.272005 | 2.746031  |
| 40. | 1. | 0. | -0.086179 | -4.624048 | 3.407399  |

#### Conformer 1-4

| 1-4              |                | Standard Orientation<br>(Ångstroms) |           |           |           |
|------------------|----------------|-------------------------------------|-----------|-----------|-----------|
| Center<br>number | Atom<br>number | Type                                | X         | Y         | Z         |
| 1.               | 6.             | 0.                                  | -0.522445 | 3.077948  | -0.351415 |
| 2.               | 6.             | 0.                                  | -0.580006 | 2.825909  | 1.033457  |
| 3.               | 6.             | 0.                                  | -0.405917 | 1.528128  | 1.518513  |
| 4.               | 6.             | 0.                                  | -0.182284 | 0.502713  | 0.607688  |
| 5.               | 6.             | 0.                                  | -0.145724 | 0.713918  | -0.779178 |
| 6.               | 6.             | 0.                                  | -0.313784 | 2.033412  | -1.246956 |
| 7.               | 8.             | 0.                                  | 0.003303  | -0.748946 | 1.132511  |
| 8.               | 6.             | 0.                                  | 0.245861  | -1.835704 | 0.319839  |
| 9.               | 6.             | 0.                                  | 0.307639  | -1.728710 | -1.032503 |
| 10.              | 6.             | 0.                                  | 0.074011  | -0.426252 | -1.677347 |
| 11.              | 6.             | 0.                                  | 0.431167  | -3.062240 | 1.164726  |
| 12.              | 6.             | 0.                                  | 1.709240  | -3.036910 | 2.045161  |
| 13.              | 8.             | 0.                                  | 1.589042  | -2.116801 | 3.121206  |
| 14.              | 6.             | 0.                                  | 0.574993  | -2.871732 | -1.974879 |
| 15.              | 8.             | 0.                                  | 0.050832  | -0.305046 | -2.906584 |
| 16.              | 6.             | 0.                                  | -0.144989 | 2.422305  | -2.706018 |
| 17.              | 8.             | 0.                                  | -1.217184 | 2.387990  | -3.523045 |
| 18.              | 8.             | 0.                                  | 0.891939  | 2.908580  | -3.087493 |
| 19.              | 8.             | 0.                                  | -0.792225 | 3.779673  | 1.972355  |
| 20.              | 6.             | 0.                                  | -0.949480 | 5.133158  | 1.555154  |
| 21.              | 6.             | 0.                                  | -2.399329 | 1.668550  | -3.152542 |



|     |    |    |           |           |           |
|-----|----|----|-----------|-----------|-----------|
| 22. | 6. | 0. | 1.975981  | -4.402165 | 2.667813  |
| 23. | 1. | 0. | -0.619555 | 4.086369  | -0.733155 |
| 24. | 1. | 0. | -0.441176 | 1.332527  | 2.583521  |
| 25. | 1. | 0. | -0.429923 | -3.164473 | 1.836820  |
| 26. | 1. | 0. | 0.453398  | -3.942532 | 0.521239  |
| 27. | 1. | 0. | 2.561860  | -2.764597 | 1.400203  |
| 28. | 1. | 0. | 1.303496  | -1.269023 | 2.755045  |
| 29. | 1. | 0. | 1.395294  | -2.607250 | -2.648635 |
| 30. | 1. | 0. | -0.296780 | -3.048933 | -2.613464 |
| 31. | 1. | 0. | 0.829023  | -3.800778 | -1.464815 |
| 32. | 1. | 0. | -1.101053 | 5.707460  | 2.469237  |
| 33. | 1. | 0. | -1.822285 | 5.253027  | 0.902706  |
| 34. | 1. | 0. | -0.054924 | 5.500407  | 1.039388  |
| 35. | 1. | 0. | -2.749811 | 1.948291  | -2.154284 |
| 36. | 1. | 0. | -2.210887 | 0.594060  | -3.199052 |
| 37. | 1. | 0. | -3.153543 | 1.946384  | -3.889707 |
| 38. | 1. | 0. | 1.116849  | -4.723124 | 3.265537  |
| 39. | 1. | 0. | 2.845015  | -4.341172 | 3.327828  |
| 40. | 1. | 0. | 2.173361  | -5.155419 | 1.899124  |

#### Conformer 1-5

| 1-5              |                | Standard Orientation<br>(Ångstroms) |           |           |           |
|------------------|----------------|-------------------------------------|-----------|-----------|-----------|
| Center<br>number | Atom<br>number | Type                                | X         | Y         | Z         |
| 1.               | 6.             | 0.                                  | -0.475427 | 3.319007  | -0.348568 |
| 2.               | 6.             | 0.                                  | -0.458718 | 3.023290  | 1.031720  |
| 3.               | 6.             | 0.                                  | -0.238983 | 1.719860  | 1.468456  |
| 4.               | 6.             | 0.                                  | -0.024892 | 0.729335  | 0.503942  |
| 5.               | 6.             | 0.                                  | -0.004831 | 0.994870  | -0.869130 |
| 6.               | 6.             | 0.                                  | -0.250473 | 2.326602  | -1.286339 |
| 7.               | 8.             | 0.                                  | 0.174103  | -0.533567 | 0.981941  |
| 8.               | 6.             | 0.                                  | 0.366452  | -1.581411 | 0.118194  |
| 9.               | 6.             | 0.                                  | 0.407427  | -1.435418 | -1.229303 |
| 10.              | 6.             | 0.                                  | 0.265629  | -0.094586 | -1.817845 |
| 11.              | 6.             | 0.                                  | 0.513654  | -2.858529 | 0.892453  |
| 12.              | 6.             | 0.                                  | -0.824154 | -3.411567 | 1.413145  |
| 13.              | 8.             | 0.                                  | -1.584325 | -3.757115 | 0.256251  |
| 14.              | 6.             | 0.                                  | 0.604389  | -2.597940 | -2.170051 |
| 15.              | 8.             | 0.                                  | 0.376875  | 0.116252  | -3.030777 |
| 16.              | 6.             | 0.                                  | -0.423711 | 2.711062  | -2.746010 |
| 17.              | 8.             | 0.                                  | 0.653946  | 3.116986  | -3.449023 |

|     |    |    |           |           |           |
|-----|----|----|-----------|-----------|-----------|
| 18. | 8. | 0. | -1.528199 | 2.803905  | -3.223601 |
| 19. | 8. | 0. | -0.679041 | 4.081089  | 1.851569  |
| 20. | 6. | 0. | -0.705426 | 3.856998  | 3.255795  |
| 21. | 6. | 0. | 1.977730  | 2.844264  | -2.974845 |
| 22. | 6. | 0. | -0.620937 | -4.619711 | 2.327477  |
| 23. | 1. | 0. | -0.688621 | 4.338371  | -0.650966 |
| 24. | 1. | 0. | -0.232669 | 1.440791  | 2.513564  |
| 25. | 1. | 0. | 0.983499  | -3.620913 | 0.266682  |
| 26. | 1. | 0. | 1.171930  | -2.670627 | 1.748108  |
| 27. | 1. | 0. | -1.330933 | -2.611520 | 1.975698  |
| 28. | 1. | 0. | -2.471286 | -4.012760 | 0.540594  |
| 29. | 1. | 0. | 1.622749  | -3.001034 | -2.113250 |
| 30. | 1. | 0. | 0.444504  | -2.247789 | -3.190927 |
| 31. | 1. | 0. | -0.097141 | -3.405981 | -1.950529 |
| 32. | 1. | 0. | -0.898933 | 4.829110  | 3.709828  |
| 33. | 1. | 0. | 0.255138  | 3.471248  | 3.618650  |
| 34. | 1. | 0. | -1.504766 | 3.159886  | 3.534981  |
| 35. | 1. | 0. | 2.183124  | 1.773610  | -3.038379 |
| 36. | 1. | 0. | 2.123403  | 3.197637  | -1.949363 |
| 37. | 1. | 0. | 2.645202  | 3.391397  | -3.641756 |
| 38. | 1. | 0. | -0.095173 | -5.418117 | 1.794258  |
| 39. | 1. | 0. | -1.585932 | -5.015234 | 2.663749  |
| 40. | 1. | 0. | -0.043185 | -4.352753 | 3.218607  |

**Table S3.** Gibbs free energies<sup>a</sup> and equilibrium populations<sup>b</sup> of low-energy conformers of phomochromenone G (**4**)

| Conformers | In gas           |           |
|------------|------------------|-----------|
|            | $G^a$            | $P(\%)^b$ |
| <b>4-1</b> | -911928.7694478  | 18.09     |
| <b>4-2</b> | -911929.27459335 | 42.48     |
| <b>4-3</b> | -911928.57052713 | 12.93     |
| <b>4-4</b> | -911928.24986952 | 7.52      |
| <b>4-5</b> | -911928.79768575 | 18.98     |

<sup>a</sup>B3LYP/6-31G(d,p), in kcal/mol. <sup>b</sup>From  $G$  values at 298.15K.

**Table S4.** Cartesian coordinates for the low-energy reoptimized MMFF conformers of phomochromenone G (**4**) at B3LYP/6-31G(d,p) level of theory in gas

Conformer **4-1**

| <b>4-1</b>    |               | Standard Orientation<br>(Ångstroms) |          |          |          |
|---------------|---------------|-------------------------------------|----------|----------|----------|
| Center number | Atomic number | Atomic Type                         | X        | Y        | Z        |
| 1.            | 6.            | 0.                                  | 3.646266 | 0.825284 | 0.032879 |

|     |    |    |           |           |           |
|-----|----|----|-----------|-----------|-----------|
| 2.  | 6. | 0. | 4.102507  | -0.490096 | 0.156935  |
| 3.  | 6. | 0. | 3.204589  | -1.565565 | 0.116914  |
| 4.  | 6. | 0. | 1.847310  | -1.288709 | -0.078917 |
| 5.  | 6. | 0. | 1.364725  | 0.024932  | -0.217533 |
| 6.  | 6. | 0. | 2.288278  | 1.087585  | -0.129451 |
| 7.  | 8. | 0. | 1.022888  | -2.379789 | -0.135038 |
| 8.  | 6. | 0. | -0.306927 | -2.199398 | -0.316335 |
| 9.  | 6. | 0. | -0.878790 | -0.987074 | -0.506176 |
| 10. | 6. | 0. | -0.059786 | 0.220779  | -0.555959 |
| 11. | 8. | 0. | -0.499741 | 1.325498  | -0.900178 |
| 12. | 6. | 0. | 1.892068  | 2.537034  | -0.182675 |
| 13. | 8. | 0. | 1.067986  | 2.863390  | 0.828258  |
| 14. | 8. | 0. | 2.357462  | 3.331087  | -0.972154 |
| 15. | 8. | 0. | 5.402126  | -0.875042 | 0.333141  |
| 16. | 6. | 0. | 6.411517  | 0.131088  | 0.367307  |
| 17. | 6. | 0. | 0.574772  | 4.213680  | 0.799153  |
| 18. | 6. | 0. | -1.070693 | -3.484702 | -0.338782 |
| 19. | 6. | 0. | -2.565816 | -3.223301 | -0.092286 |
| 20. | 8. | 0. | -2.996661 | -2.141876 | -0.932729 |
| 21. | 6. | 0. | -2.371085 | -0.884634 | -0.747900 |
| 22. | 8. | 0. | 3.627012  | -2.846899 | 0.244430  |
| 23. | 8. | 0. | -2.916657 | -0.159961 | 0.334600  |
| 24. | 6. | 0. | -2.907642 | -3.034832 | 1.388074  |
| 25. | 6. | 0. | -4.179618 | 0.492249  | 0.067382  |
| 26. | 6. | 0. | -3.936985 | 1.975957  | -0.278851 |
| 27. | 6. | 0. | -5.083254 | 0.274638  | 1.275863  |
| 28. | 8. | 0. | -3.183081 | 2.084490  | -1.477223 |
| 29. | 6. | 0. | -3.295173 | 2.780465  | 0.855374  |
| 30. | 1. | 0. | 4.337671  | 1.657745  | 0.068747  |
| 31. | 1. | 0. | 7.356099  | -0.397022 | 0.498275  |
| 32. | 1. | 0. | 6.257307  | 0.817182  | 1.207823  |
| 33. | 1. | 0. | 6.435909  | 0.698751  | -0.569509 |
| 34. | 1. | 0. | -0.028915 | 4.324277  | 1.699338  |
| 35. | 1. | 0. | 1.401259  | 4.928004  | 0.796264  |
| 36. | 1. | 0. | -0.038494 | 4.366068  | -0.091993 |
| 37. | 1. | 0. | -0.926064 | -3.956858 | -1.319173 |
| 38. | 1. | 0. | -0.656378 | -4.168313 | 0.409436  |
| 39. | 1. | 0. | -3.131122 | -4.081054 | -0.469856 |
| 40. | 1. | 0. | -2.561657 | -0.347542 | -1.682561 |
| 41. | 1. | 0. | 4.590773  | -2.814076 | 0.353467  |
| 42. | 1. | 0. | -3.973654 | -2.824393 | 1.500079  |
| 43. | 1. | 0. | -2.354341 | -2.206911 | 1.835306  |
| 44. | 1. | 0. | -2.678713 | -3.953733 | 1.939259  |

|     |    |    |           |           |           |
|-----|----|----|-----------|-----------|-----------|
| 45. | 1. | 0. | -4.634834 | 0.024161  | -0.814080 |
| 46. | 1. | 0. | -4.921523 | 2.407173  | -0.509259 |
| 47. | 1. | 0. | -4.586446 | 0.592087  | 2.196849  |
| 48. | 1. | 0. | -5.341430 | -0.782712 | 1.376759  |
| 49. | 1. | 0. | -6.012756 | 0.844451  | 1.171017  |
| 50. | 1. | 0. | -2.253482 | 1.869924  | -1.266682 |
| 51. | 1. | 0. | -2.334919 | 2.337986  | 1.136402  |
| 52. | 1. | 0. | -3.120543 | 3.804799  | 0.514218  |
| 53. | 1. | 0. | -3.931992 | 2.820544  | 1.744928  |

## Conformer 4-2

| 4-2              |                | Standard Orientation<br>(Ångstroms) |           |           |           |
|------------------|----------------|-------------------------------------|-----------|-----------|-----------|
| Center<br>number | Atom<br>number | Type                                | X         | Y         | Z         |
| 1.               | 6.             | 0.                                  | -3.691043 | -0.732659 | -0.042978 |
| 2.               | 6.             | 0.                                  | -4.106963 | 0.584792  | 0.167230  |
| 3.               | 6.             | 0.                                  | -3.171968 | 1.625997  | 0.243738  |
| 4.               | 6.             | 0.                                  | -1.817963 | 1.314586  | 0.078431  |
| 5.               | 6.             | 0.                                  | -1.374712 | -0.001252 | -0.143826 |
| 6.               | 6.             | 0.                                  | -2.337150 | -1.032317 | -0.175120 |
| 7.               | 8.             | 0.                                  | -0.957936 | 2.378731  | 0.118891  |
| 8.               | 6.             | 0.                                  | 0.374058  | 2.161393  | 0.004277  |
| 9.               | 6.             | 0.                                  | 0.915524  | 0.939474  | -0.218418 |
| 10.              | 6.             | 0.                                  | 0.055389  | -0.218873 | -0.449693 |
| 11.              | 8.             | 0.                                  | 0.466054  | -1.291136 | -0.909993 |
| 12.              | 6.             | 0.                                  | -1.994096 | -2.487457 | -0.328496 |
| 13.              | 8.             | 0.                                  | -1.182271 | -2.916001 | 0.653220  |
| 14.              | 8.             | 0.                                  | -2.489390 | -3.206352 | -1.170751 |
| 15.              | 8.             | 0.                                  | -5.399006 | 1.003163  | 0.323493  |
| 16.              | 6.             | 0.                                  | -6.442329 | 0.035775  | 0.235620  |
| 17.              | 6.             | 0.                                  | -0.748372 | -4.281301 | 0.530824  |
| 18.              | 6.             | 0.                                  | 1.179104  | 3.420817  | 0.079943  |
| 19.              | 6.             | 0.                                  | 2.549866  | 3.180931  | -0.571314 |
| 20.              | 8.             | 0.                                  | 3.111915  | 1.997643  | -0.012825 |
| 21.              | 6.             | 0.                                  | 2.421578  | 0.790771  | -0.339204 |
| 22.              | 8.             | 0.                                  | -3.555356 | 2.909216  | 0.450568  |
| 23.              | 8.             | 0.                                  | 2.835097  | -0.181513 | 0.563573  |
| 24.              | 6.             | 0.                                  | 3.535226  | 4.312768  | -0.327569 |
| 25.              | 6.             | 0.                                  | 4.113079  | -0.797471 | 0.280311  |
| 26.              | 6.             | 0.                                  | 3.862941  | -2.215727 | -0.268540 |

|     |    |    |           |           |           |
|-----|----|----|-----------|-----------|-----------|
| 27. | 6. | 0. | 4.956195  | -0.727319 | 1.547366  |
| 28. | 8. | 0. | 3.149174  | -2.135183 | -1.493145 |
| 29. | 6. | 0. | 3.163449  | -3.149301 | 0.723480  |
| 30. | 1. | 0. | -4.410441 | -1.539812 | -0.100355 |
| 31. | 1. | 0. | -7.373405 | 0.586797  | 0.369110  |
| 32. | 1. | 0. | -6.348880 | -0.719375 | 1.024257  |
| 33. | 1. | 0. | -6.444316 | -0.455538 | -0.743701 |
| 34. | 1. | 0. | -0.140107 | -4.475053 | 1.413616  |
| 35. | 1. | 0. | -1.605425 | -4.957762 | 0.493995  |
| 36. | 1. | 0. | -0.152498 | -4.402926 | -0.376617 |
| 37. | 1. | 0. | 0.629152  | 4.227150  | -0.417949 |
| 38. | 1. | 0. | 1.314290  | 3.715123  | 1.128855  |
| 39. | 1. | 0. | 2.403056  | 3.048298  | -1.656655 |
| 40. | 1. | 0. | 2.683805  | 0.497137  | -1.368750 |
| 41. | 1. | 0. | -4.523246 | 2.903721  | 0.521085  |
| 42. | 1. | 0. | 4.488800  | 4.093223  | -0.814111 |
| 43. | 1. | 0. | 3.716839  | 4.432532  | 0.744866  |
| 44. | 1. | 0. | 3.148608  | 5.256161  | -0.725533 |
| 45. | 1. | 0. | 4.607366  | -0.228003 | -0.516081 |
| 46. | 1. | 0. | 4.845552  | -2.636507 | -0.524391 |
| 47. | 1. | 0. | 4.435821  | -1.189989 | 2.390445  |
| 48. | 1. | 0. | 5.154854  | 0.316538  | 1.803421  |
| 49. | 1. | 0. | 5.913130  | -1.241487 | 1.406683  |
| 50. | 1. | 0. | 2.229875  | -1.879686 | -1.283343 |
| 51. | 1. | 0. | 2.980875  | -4.113774 | 0.241285  |
| 52. | 1. | 0. | 3.766603  | -3.322874 | 1.620483  |
| 53. | 1. | 0. | 2.202576  | -2.724195 | 1.028767  |

### Conformer 4-3

| 4-3              |                | Standard Orientation<br>(Ångstroms) |           |           |           |
|------------------|----------------|-------------------------------------|-----------|-----------|-----------|
| Center<br>number | Atom<br>number | Type                                | X         | Y         | Z         |
| 1.               | 6.             | 0.                                  | 3.665979  | 0.687349  | 0.318113  |
| 2.               | 6.             | 0.                                  | 4.051014  | -0.656487 | 0.360135  |
| 3.               | 6.             | 0.                                  | 3.117046  | -1.677122 | 0.134063  |
| 4.               | 6.             | 0.                                  | 1.787737  | -1.315636 | -0.107304 |
| 5.               | 6.             | 0.                                  | 1.372948  | 0.026988  | -0.139683 |
| 6.               | 6.             | 0.                                  | 2.344736  | 1.031616  | 0.047043  |
| 7.               | 8.             | 0.                                  | 0.916127  | -2.351317 | -0.308126 |
| 8.               | 6.             | 0.                                  | -0.393592 | -2.086507 | -0.526368 |

|     |    |    |           |           |           |
|-----|----|----|-----------|-----------|-----------|
| 9.  | 6. | 0. | -0.920111 | -0.838508 | -0.510943 |
| 10. | 6. | 0. | -0.066337 | 0.323365  | -0.282906 |
| 11. | 8. | 0. | -0.495645 | 1.482918  | -0.212021 |
| 12. | 6. | 0. | 2.026147  | 2.500157  | -0.040651 |
| 13. | 8. | 0. | 1.690839  | 2.850107  | -1.294599 |
| 14. | 8. | 0. | 2.166007  | 3.276750  | 0.879171  |
| 15. | 8. | 0. | 5.313308  | -1.121507 | 0.602011  |
| 16. | 6. | 0. | 6.347535  | -0.177930 | 0.869834  |
| 17. | 6. | 0. | 1.239575  | 4.206337  | -1.452301 |
| 18. | 6. | 0. | -1.187092 | -3.317977 | -0.823998 |
| 19. | 6. | 0. | -2.688306 | -3.061624 | -0.611618 |
| 20. | 8. | 0. | -3.045832 | -1.815165 | -1.228765 |
| 21. | 6. | 0. | -2.405066 | -0.644516 | -0.751450 |
| 22. | 8. | 0. | 3.474301  | -2.984512 | 0.159555  |
| 23. | 8. | 0. | -2.970390 | -0.167228 | 0.450668  |
| 24. | 6. | 0. | -3.113784 | -3.179311 | 0.854343  |
| 25. | 6. | 0. | -4.210141 | 0.564529  | 0.301195  |
| 26. | 6. | 0. | -3.926464 | 2.081131  | 0.323134  |
| 27. | 6. | 0. | -5.167683 | 0.096494  | 1.391453  |
| 28. | 8. | 0. | -3.097679 | 2.437985  | -0.774190 |
| 29. | 6. | 0. | -3.343800 | 2.585896  | 1.645847  |
| 30. | 1. | 0. | 4.389324  | 1.475397  | 0.486635  |
| 31. | 1. | 0. | 7.249053  | -0.764487 | 1.047486  |
| 32. | 1. | 0. | 6.117548  | 0.418724  | 1.759542  |
| 33. | 1. | 0. | 6.507823  | 0.486945  | 0.013559  |
| 34. | 1. | 0. | 1.099057  | 4.346152  | -2.523736 |
| 35. | 1. | 0. | 0.292519  | 4.341154  | -0.924249 |
| 36. | 1. | 0. | 1.978407  | 4.909819  | -1.062407 |
| 37. | 1. | 0. | -0.995854 | -3.601467 | -1.867297 |
| 38. | 1. | 0. | -0.830182 | -4.142891 | -0.198949 |
| 39. | 1. | 0. | -3.248008 | -3.802088 | -1.191622 |
| 40. | 1. | 0. | -2.560188 | 0.091253  | -1.547338 |
| 41. | 1. | 0. | 4.424712  | -3.011166 | 0.353651  |
| 42. | 1. | 0. | -4.179221 | -2.959583 | 0.951899  |
| 43. | 1. | 0. | -2.568907 | -2.486884 | 1.498632  |
| 44. | 1. | 0. | -2.940112 | -4.202782 | 1.205038  |
| 45. | 1. | 0. | -4.637065 | 0.328008  | -0.681207 |
| 46. | 1. | 0. | -4.889298 | 2.580131  | 0.142641  |
| 47. | 1. | 0. | -4.700224 | 0.166922  | 2.377448  |
| 48. | 1. | 0. | -5.459723 | -0.943895 | 1.227170  |
| 49. | 1. | 0. | -6.075464 | 0.709277  | 1.396024  |
| 50. | 1. | 0. | -2.190145 | 2.148002  | -0.557025 |
| 51. | 1. | 0. | -2.413316 | 2.059579  | 1.877212  |

|     |    |    |           |          |          |
|-----|----|----|-----------|----------|----------|
| 52. | 1. | 0. | -3.123205 | 3.653277 | 1.558758 |
| 53. | 1. | 0. | -4.037853 | 2.446883 | 2.480876 |

#### Conformer 4-4

| 4-4              |                | Standard Orientation<br>(Ångstroms) |           |           |           |
|------------------|----------------|-------------------------------------|-----------|-----------|-----------|
| Center<br>number | Atom<br>number | Type                                | X         | Y         | Z         |
| 1.               | 6.             | 0.                                  | 3.630391  | 1.038074  | 0.012030  |
| 2.               | 6.             | 0.                                  | 4.179025  | -0.244800 | 0.105838  |
| 3.               | 6.             | 0.                                  | 3.360806  | -1.382641 | 0.053769  |
| 4.               | 6.             | 0.                                  | 1.984944  | -1.201666 | -0.120679 |
| 5.               | 6.             | 0.                                  | 1.412118  | 0.078515  | -0.229120 |
| 6.               | 6.             | 0.                                  | 2.255757  | 1.204157  | -0.130814 |
| 7.               | 8.             | 0.                                  | 1.235328  | -2.347396 | -0.180519 |
| 8.               | 6.             | 0.                                  | -0.106672 | -2.254012 | -0.340283 |
| 9.               | 6.             | 0.                                  | -0.756442 | -1.079054 | -0.502135 |
| 10.              | 6.             | 0.                                  | -0.028107 | 0.183835  | -0.528649 |
| 11.              | 8.             | 0.                                  | -0.566893 | 1.259453  | -0.821035 |
| 12.              | 6.             | 0.                                  | 1.733655  | 2.615858  | -0.162090 |
| 13.              | 8.             | 0.                                  | 0.923521  | 2.857472  | 0.882677  |
| 14.              | 8.             | 0.                                  | 2.093368  | 3.443882  | -0.971236 |
| 15.              | 8.             | 0.                                  | 5.504614  | -0.539580 | 0.262192  |
| 16.              | 6.             | 0.                                  | 6.438456  | 0.535454  | 0.326584  |
| 17.              | 6.             | 0.                                  | 0.227845  | 4.118606  | 0.863810  |
| 18.              | 6.             | 0.                                  | -0.796816 | -3.580725 | -0.362919 |
| 19.              | 6.             | 0.                                  | -2.300465 | -3.406602 | -0.080507 |
| 20.              | 8.             | 0.                                  | -2.816409 | -2.343958 | -0.898784 |
| 21.              | 6.             | 0.                                  | -2.254041 | -1.057548 | -0.713078 |
| 22.              | 8.             | 0.                                  | 3.877709  | -2.631735 | 0.153410  |
| 23.              | 8.             | 0.                                  | -2.800253 | -0.369815 | 0.387068  |
| 24.              | 6.             | 0.                                  | -2.622928 | -3.248235 | 1.407509  |
| 25.              | 6.             | 0.                                  | -4.091120 | 0.252327  | 0.184150  |
| 26.              | 6.             | 0.                                  | -3.897266 | 1.603533  | -0.546396 |
| 27.              | 6.             | 0.                                  | -4.697572 | 0.393247  | 1.573695  |
| 28.              | 8.             | 0.                                  | -2.988492 | 2.429938  | 0.161204  |
| 29.              | 6.             | 0.                                  | -5.200126 | 2.375712  | -0.730305 |
| 30.              | 1.             | 0.                                  | 4.262217  | 1.916299  | 0.058065  |
| 31.              | 1.             | 0.                                  | 7.418658  | 0.073658  | 0.446169  |
| 32.              | 1.             | 0.                                  | 6.233875  | 1.185602  | 1.184681  |

|     |    |    |           |           |           |
|-----|----|----|-----------|-----------|-----------|
| 33. | 1. | 0. | 6.423197  | 1.128442  | -0.594634 |
| 34. | 1. | 0. | -0.137038 | 4.270623  | 1.879315  |
| 35. | 1. | 0. | 0.898449  | 4.925248  | 0.563437  |
| 36. | 1. | 0. | -0.614677 | 4.052805  | 0.170474  |
| 37. | 1. | 0. | -0.648281 | -4.035635 | -1.350811 |
| 38. | 1. | 0. | -0.330413 | -4.247717 | 0.369515  |
| 39. | 1. | 0. | -2.823590 | -4.292129 | -0.454564 |
| 40. | 1. | 0. | -2.481908 | -0.528733 | -1.646205 |
| 41. | 1. | 0. | 4.837384  | -2.529620 | 0.255190  |
| 42. | 1. | 0. | -3.695221 | -3.083125 | 1.537512  |
| 43. | 1. | 0. | -2.097034 | -2.402450 | 1.854374  |
| 44. | 1. | 0. | -2.346433 | -4.162028 | 1.945093  |
| 45. | 1. | 0. | -4.712552 | -0.410981 | -0.434634 |
| 46. | 1. | 0. | -3.492159 | 1.382084  | -1.547282 |
| 47. | 1. | 0. | -4.111110 | 1.106760  | 2.157942  |
| 48. | 1. | 0. | -4.692920 | -0.572697 | 2.084969  |
| 49. | 1. | 0. | -5.729946 | 0.748935  | 1.519685  |
| 50. | 1. | 0. | -2.116680 | 2.009859  | 0.053748  |
| 51. | 1. | 0. | -5.595793 | 2.705628  | 0.234310  |
| 52. | 1. | 0. | -5.017727 | 3.265246  | -1.338928 |
| 53. | 1. | 0. | -5.958885 | 1.763631  | -1.229692 |

#### Conformer 4-5

| 4-5              |                | Standard Orientation<br>(Ångstroms) |           |           |           |
|------------------|----------------|-------------------------------------|-----------|-----------|-----------|
| Center<br>number | Atom<br>number | Type                                | X         | Y         | Z         |
| 1.               | 6.             | 0.                                  | -3.671523 | -0.966586 | -0.071148 |
| 2.               | 6.             | 0.                                  | -4.189948 | 0.321447  | 0.092504  |
| 3.               | 6.             | 0.                                  | -3.340032 | 1.434594  | 0.163540  |
| 4.               | 6.             | 0.                                  | -1.962456 | 1.224808  | 0.041138  |
| 5.               | 6.             | 0.                                  | -1.419022 | -0.059669 | -0.136188 |
| 6.               | 6.             | 0.                                  | -2.296314 | -1.163685 | -0.162357 |
| 7.               | 8.             | 0.                                  | -1.181393 | 2.349909  | 0.080198  |
| 8.               | 6.             | 0.                                  | 0.165614  | 2.226122  | 0.002441  |
| 9.               | 6.             | 0.                                  | 0.796612  | 1.041350  | -0.177465 |
| 10.              | 6.             | 0.                                  | 0.029557  | -0.181894 | -0.391933 |
| 11.              | 8.             | 0.                                  | 0.538045  | -1.233091 | -0.800501 |
| 12.              | 6.             | 0.                                  | -1.818071 | -2.585930 | -0.274304 |
| 13.              | 8.             | 0.                                  | -1.016009 | -2.915767 | 0.751955  |
| 14.              | 8.             | 0.                                  | -2.204094 | -3.354572 | -1.129284 |



|     |    |    |           |           |           |
|-----|----|----|-----------|-----------|-----------|
| 15. | 8. | 0. | -5.513650 | 0.644152  | 0.206234  |
| 16. | 6. | 0. | -6.478952 | -0.401057 | 0.119382  |
| 17. | 6. | 0. | -0.375104 | -4.202355 | 0.660741  |
| 18. | 6. | 0. | 0.884808  | 3.537095  | 0.073168  |
| 19. | 6. | 0. | 2.288679  | 3.375249  | -0.531200 |
| 20. | 8. | 0. | 2.914037  | 2.241469  | 0.063598  |
| 21. | 6. | 0. | 2.311245  | 0.989967  | -0.262484 |
| 22. | 8. | 0. | -3.827712 | 2.688668  | 0.326495  |
| 23. | 8. | 0. | 2.759314  | 0.052811  | 0.657950  |
| 24. | 6. | 0. | 3.189113  | 4.574549  | -0.280853 |
| 25. | 6. | 0. | 4.044429  | -0.559861 | 0.388334  |
| 26. | 6. | 0. | 3.827376  | -1.759931 | -0.563316 |
| 27. | 6. | 0. | 4.606838  | -0.943927 | 1.749228  |
| 28. | 8. | 0. | 2.878171  | -2.660440 | -0.019585 |
| 29. | 6. | 0. | 5.107812  | -2.535418 | -0.856108 |
| 30. | 1. | 0. | -4.326858 | -1.827076 | -0.121448 |
| 31. | 1. | 0. | -7.451718 | 0.080857  | 0.218673  |
| 32. | 1. | 0. | -6.348068 | -1.128804 | 0.928209  |
| 33. | 1. | 0. | -6.420956 | -0.913518 | -0.847353 |
| 34. | 1. | 0. | 0.025016  | -4.402964 | 1.654145  |
| 35. | 1. | 0. | -1.091374 | -4.970451 | 0.364121  |
| 36. | 1. | 0. | 0.439428  | -4.150296 | -0.066238 |
| 37. | 1. | 0. | 0.301774  | 4.296534  | -0.459649 |
| 38. | 1. | 0. | 0.966769  | 3.861114  | 1.118839  |
| 39. | 1. | 0. | 2.183369  | 3.214815  | -1.617839 |
| 40. | 1. | 0. | 2.608170  | 0.713532  | -1.289548 |
| 41. | 1. | 0. | -4.793713 | 2.608421  | 0.373685  |
| 42. | 1. | 0. | 4.169582  | 4.411275  | -0.735014 |
| 43. | 1. | 0. | 3.329852  | 4.724389  | 0.793901  |
| 44. | 1. | 0. | 2.752814  | 5.483027  | -0.707657 |
| 45. | 1. | 0. | 4.698069  | 0.179826  | -0.094996 |
| 46. | 1. | 0. | 3.448111  | -1.354038 | -1.516052 |
| 47. | 1. | 0. | 3.983083  | -1.721568 | 2.196803  |
| 48. | 1. | 0. | 4.615716  | -0.071247 | 2.406787  |
| 49. | 1. | 0. | 5.628736  | -1.322955 | 1.659994  |
| 50. | 1. | 0. | 2.026631  | -2.189453 | -0.058071 |
| 51. | 1. | 0. | 4.909138  | -3.303648 | -1.608015 |
| 52. | 1. | 0. | 5.896705  | -1.875983 | -1.233799 |
| 53. | 1. | 0. | 5.472081  | -3.036118 | 0.045306  |
